# Supplementary material
Source: ML conference proceedings conference paper supplement (https://openreview.net/forum?id=X8ItT6mGKF)

# Labelling Annotation Guideline

| Date       | Version | Editor                 | Change Protocol  |
|------------|---------|------------------------|------------------|
| 2023.09.27 | 1.0     | b-plus automotive GmbH | Initial document |
| 2024.03.28 | 1.1     | b-plus automotive GmbH | Final document   |

1. Template

| #    | DO?                                                                                      | Description | Image |
|------|------------------------------------------------------------------------------------------|-------------|-------|
| 0001 | <br>YES | Do XYZ      |       |
| 0002 | <br>NO  | Don't XYZ   |       |

0000

2. General Guidelines

2.1 Labelling Examples

| Input                                                                             | Output                                                                              |
|-----------------------------------------------------------------------------------|-------------------------------------------------------------------------------------|
|  |  |

2.2 Minimum number of points

| #    | DO?                                                                                        | Description                                                                                                                                                                                                                                                                                          | Image                                                                                |
|------|--------------------------------------------------------------------------------------------|------------------------------------------------------------------------------------------------------------------------------------------------------------------------------------------------------------------------------------------------------------------------------------------------------|--------------------------------------------------------------------------------------|
| 0001 | <br>YES | <p>Label any target object containing at least 1 LIDAR or RADAR point, as long as you can be reasonably sure you know the location and shape of the object. Use your best judgment on correct cuboid position, sizing, and heading.</p> <p>Example: Estimated size of car using one lidar point.</p> |  |

## 2.3 Cuboid sizing

| #    | DO?                                                                                      | Description                                                                                                                                                                                                                           | Image                                                                              |
|------|------------------------------------------------------------------------------------------|---------------------------------------------------------------------------------------------------------------------------------------------------------------------------------------------------------------------------------------|------------------------------------------------------------------------------------|
| 0002 | <br>YES | Cuboids must be very tight. Draw the cuboid as close as possible to the edge of the object without excluding any LIDAR points. There should be almost no visible space between the cuboid border and the closest point on the object. |  |

2.4 Extremities

| #    | DO?      | Description                                                                                                             | Image                                                                               |                                                                                     |
|------|----------|-------------------------------------------------------------------------------------------------------------------------|-------------------------------------------------------------------------------------|-------------------------------------------------------------------------------------|
| 0003 | 👍<br>YES | If an object has extremities (e.g. arms and legs of pedestrians), then the bounding box should include the extremities. | 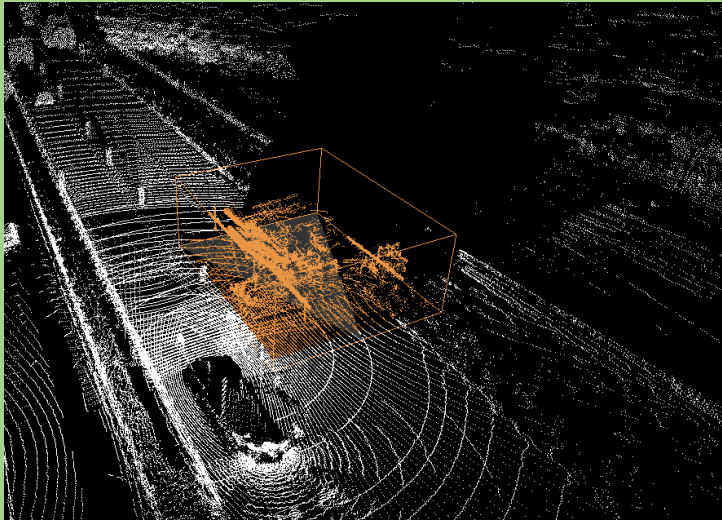  |  |
| 0004 | ✗<br>NO  | Do not include vehicle side view mirrors.                                                                               |  |                                                                                     |

2.5 Carried Object

| #    | DO?                                                                                      | Description                                                                                                                                                                                                                                                      | Image |
|------|------------------------------------------------------------------------------------------|------------------------------------------------------------------------------------------------------------------------------------------------------------------------------------------------------------------------------------------------------------------|-------|
| 0005 | <br>YES | If a pedestrian is carrying an object (bags, umbrellas, tools etc.), such object will be included in the bounding box for the pedestrian. If two or more pedestrians are carrying the same object, the bounding box of only one of them will include the object. |       |

2.6 Use Pictures

| #    | DO?                                                                                      | Description                                                                                                                                                                                                               | Image                                                                                                                                                                                                                                                                |
|------|------------------------------------------------------------------------------------------|---------------------------------------------------------------------------------------------------------------------------------------------------------------------------------------------------------------------------|----------------------------------------------------------------------------------------------------------------------------------------------------------------------------------------------------------------------------------------------------------------------|
| 0006 | <br>YES | For objects with few LIDAR or RADAR points, use the images to make sure boxes are correctly sized. If you see that a cuboid is too short in the image view, adjust it to cover the entire object based on the image view. | <div></div> |

2.7 Visibility Attribute

| #    | DO?                                  | Description                                                                                                                                                                                                                                            | Image                                                                                                                                                                                                                                                                                       |
|------|--------------------------------------|--------------------------------------------------------------------------------------------------------------------------------------------------------------------------------------------------------------------------------------------------------|---------------------------------------------------------------------------------------------------------------------------------------------------------------------------------------------------------------------------------------------------------------------------------------------|
| 0007 | <div><div></div><div>YES</div></div> | <p>The visibility attribute specifies the percentage of object pixels visible in the panoramic view of all cameras.</p> <p>This is a trailer spanning multiple cameras. The combined view covers more than 80%, so it should be marked as &gt;80%.</p> | <div></div> <div></div> <div></div> |

2.8 Scene Tagging

| #    | DO?                                  | Description                                                                                                                         | Image |
|------|--------------------------------------|-------------------------------------------------------------------------------------------------------------------------------------|-------|
| 0008 | <div><div></div><div>YES</div></div> | <p>If several attributes within a category apply to several cameras, only one attribute with the closest match should be taken.</p> |       |



3. Class-specific Guidelines

3.1 animal

| #    | DO?                                                                                      | Description                                      | Image                                                                                                                                                                                                                                                                                                                                                                                                                                       |
|------|------------------------------------------------------------------------------------------|--------------------------------------------------|---------------------------------------------------------------------------------------------------------------------------------------------------------------------------------------------------------------------------------------------------------------------------------------------------------------------------------------------------------------------------------------------------------------------------------------------|
| 0009 | <br>YES | All animals, e.g. cats, rats, dogs, deer, birds. | <div></div> |



3.2 human.pedestrian.adult

| #    | DO?                                                                                      | Description                                            | Image                                                                                                                                                                                                                                                              |
|------|------------------------------------------------------------------------------------------|--------------------------------------------------------|--------------------------------------------------------------------------------------------------------------------------------------------------------------------------------------------------------------------------------------------------------------------|
| 0010 | <br>YES | An adult pedestrian moving around the cityscape.       | <div></div> |
| 0011 | <br>NO | Mannequins should also be treated as adult pedestrian. |                                                                                                                                                                                                                                                                    |

3.3 human.pedestrian.child

| #    | DO?                                                                                      | Description                                     | Image                                                                              |                                                                                     |                                                                                     |
|------|------------------------------------------------------------------------------------------|-------------------------------------------------|------------------------------------------------------------------------------------|-------------------------------------------------------------------------------------|-------------------------------------------------------------------------------------|
| 0012 | <br>YES | A child pedestrian moving around the cityscape. |  |  |  |

3.4human.pedestrian.construction\_worker

| #    | DO?                                                                                      | Description                                                                                                       | Image                                                                               |
|------|------------------------------------------------------------------------------------------|-------------------------------------------------------------------------------------------------------------------|-------------------------------------------------------------------------------------|
| 0013 | <br>YES | A human in the scene whose main purpose is construction work.                                                     |   |
| 0014 | <br>NO  | Don't use this class for people that are just wearing warning vests.<br><br>Use "human.pedestrian.adult" instead. |  |

3.5 human.pedestrian.police\_officer

| #    | DO?                                                                                      | Description                                                                  | Image                                                                              |                                                                                     |                                                                                     |
|------|------------------------------------------------------------------------------------------|------------------------------------------------------------------------------|------------------------------------------------------------------------------------|-------------------------------------------------------------------------------------|-------------------------------------------------------------------------------------|
| 0015 | <br>YES | Any type of police officer, regardless whether directing the traffic or not. |  |  |  |

3.6 human.pedestrian.stroller

| #    | DO?                                                                                      | Description                                                                                                                                                | Image                                                                                                                                                                                                                                                                                                                                                   |
|------|------------------------------------------------------------------------------------------|------------------------------------------------------------------------------------------------------------------------------------------------------------|---------------------------------------------------------------------------------------------------------------------------------------------------------------------------------------------------------------------------------------------------------------------------------------------------------------------------------------------------------|
| 0016 | <br>YES | <p>Any stroller.</p> <p>If a person is in the stroller, include in the annotation.</p> <p>Pedestrians pushing strollers should be labelled separately.</p> | <div></div> |

3.7 human.pedestrian.personal\_mobility

| #    | DO?                                                                                      | Description                                                                                                                                                                                                                                                   | Image                                                                                                                                                                                                                                                                                                                                                               |
|------|------------------------------------------------------------------------------------------|---------------------------------------------------------------------------------------------------------------------------------------------------------------------------------------------------------------------------------------------------------------|---------------------------------------------------------------------------------------------------------------------------------------------------------------------------------------------------------------------------------------------------------------------------------------------------------------------------------------------------------------------|
| 0017 | <br>YES | <p>A small electric or self-propelled vehicle, e.g. skateboard, segway, or scooters, on which the person typically travels in an upright position.</p> <p>Driver and (if applicable) rider should be included in the bounding box along with the vehicle.</p> | <div></div> <div></div> |



3.8 human.pedestrian.wheelchair

| #    | DO?                                                                                      | Description                                                                                                                                                             | Image                                                                              |                                                                                     |
|------|------------------------------------------------------------------------------------------|-------------------------------------------------------------------------------------------------------------------------------------------------------------------------|------------------------------------------------------------------------------------|-------------------------------------------------------------------------------------|
| 0018 | <br>YES | <p>Any type of wheelchair.</p> <p>If a person is in the wheelchair, include in the annotation.</p> <p>Pedestrians pushing wheelchairs should be labeled separately.</p> |  |  |



3.9 vehicle.car

| #    | DO?                                   | Description                                                                                                                                                                                                  | Image                                                                                                                                                                                                                                                                                                                                                                                                                                    |
|------|---------------------------------------|--------------------------------------------------------------------------------------------------------------------------------------------------------------------------------------------------------------|------------------------------------------------------------------------------------------------------------------------------------------------------------------------------------------------------------------------------------------------------------------------------------------------------------------------------------------------------------------------------------------------------------------------------------------|
| 0019 | <div><div>👍</div><div>YES</div></div> | Vehicle designed primarily for personal use, e.g. sedans, hatch-backs, wagons, vans, mini-vans, campervan, SUVs and jeeps.                                                                                   | <div></div> |
| 0020 | <div><div>✖</div><div>NO</div></div>  | <div><div>If the vehicle is designed to carry more than 10 people label it is not a car.</div><div>Label it as a bus instead.</div><div>If it is primarily designed to haul cargo it is a truck.</div></div> | <div></div>                                                                                                                                                                                                                                                                                                                                          |

3.10 vehicle.truck

| #    | DO?                                  | Description                                                                                                                                                                        | Image                                                                                                                                                                                                                                                                                                                                                                                                                                                                                                                                                                                                                                                                                  |
|------|--------------------------------------|------------------------------------------------------------------------------------------------------------------------------------------------------------------------------------|----------------------------------------------------------------------------------------------------------------------------------------------------------------------------------------------------------------------------------------------------------------------------------------------------------------------------------------------------------------------------------------------------------------------------------------------------------------------------------------------------------------------------------------------------------------------------------------------------------------------------------------------------------------------------------------|
| 0021 | <div><div></div><div>YES</div></div> | <p>Vehicles primarily designed to haul cargo including pick-ups, lorries, trucks and semi-tractors.</p> <p>Last example:<br/>blue, green = truck<br/>Yellow = trailer</p>          | <div>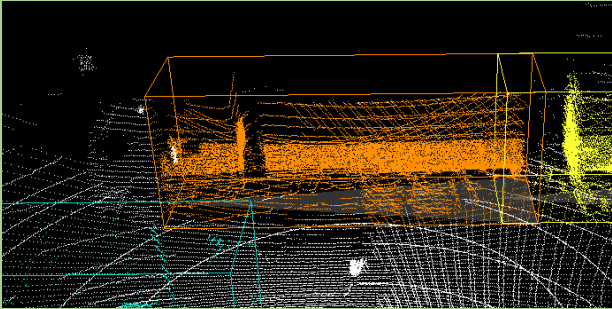</div> <div></div> <div></div> <div></div> <div></div> <div></div> <div></div> |
| 0022 | <div><div></div><div>YES</div></div> | <p>A pickup truck is a light duty truck with an enclosed cab and an open or closed cargo area. A pickup truck can be intended primarily for hauling cargo or for personal use.</p> |                                                                                                                                                                                                                                                                                                                                                                                                                                                                                                                                                                                                                                                                                        |

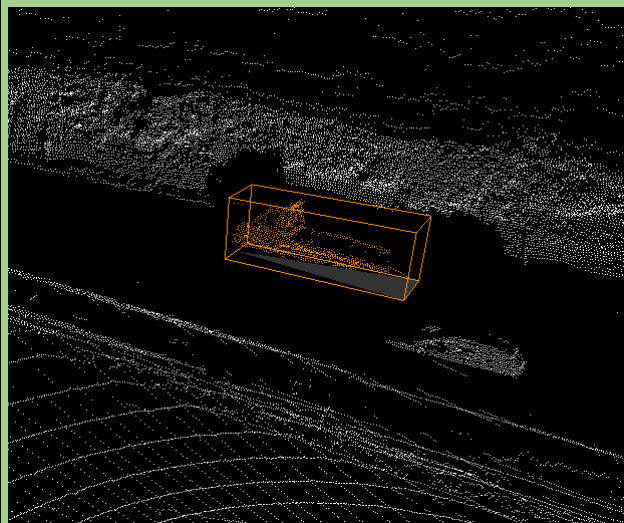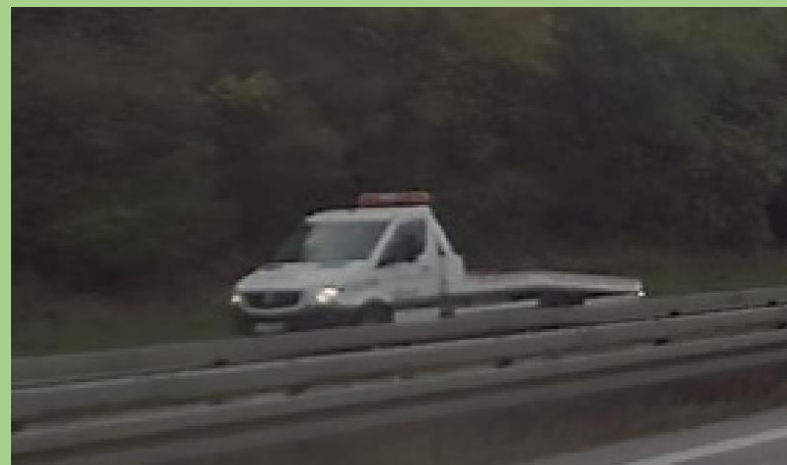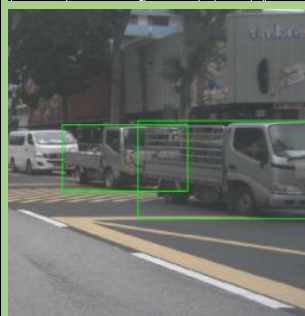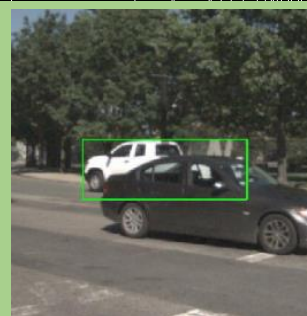

0023

👍  
YES

Tractor part of a semi trailer truck.  
Trailers hauled after a semi-  
tractor should be labeled as a  
trailer.

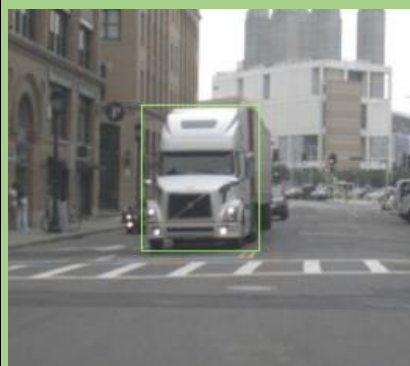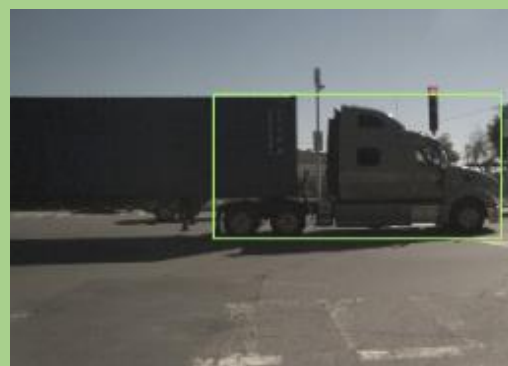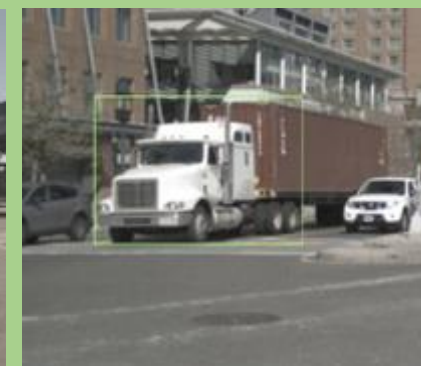



3.11 vehicle.trailer

| #    | DO?                                                                                                                   | Description                                                                                                                                                                                                                                                               | Image                                                                                                                                                                                                                                                                                                                                                                                                                                                                                                                                                                                   |
|------|-----------------------------------------------------------------------------------------------------------------------|---------------------------------------------------------------------------------------------------------------------------------------------------------------------------------------------------------------------------------------------------------------------------|-----------------------------------------------------------------------------------------------------------------------------------------------------------------------------------------------------------------------------------------------------------------------------------------------------------------------------------------------------------------------------------------------------------------------------------------------------------------------------------------------------------------------------------------------------------------------------------------|
| 0024 | <div><div></div><div>YES</div></div> | <p>Any vehicle trailer, both for trucks, cars and motorcycles (regardless of whether currently being towed or not).</p> <p>For semi-trailers (containers) label the truck itself as "front of semi truck".</p> <p>Last example:<br/>blue = truck<br/>Yellow = trailer</p> | <div></div> <div></div> <div></div> <div></div> <div></div> <div></div> |

0025

✗  
NO

Don't label trailer here because the container is not part of the trailer anymore at the time it was detached.

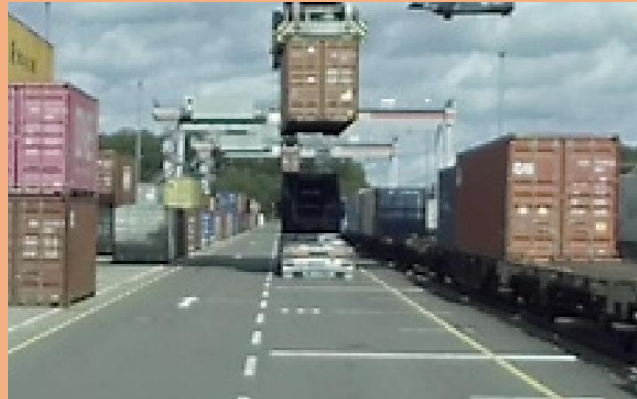

3.12 vehicle.train

| #    | DO?      | Description                                                | Image                                                                               |                                                                                     |
|------|----------|------------------------------------------------------------|-------------------------------------------------------------------------------------|-------------------------------------------------------------------------------------|
| 0026 | 👍<br>YES | Use this class for the objects on the right example.       |   |  |
| 0027 | ✗<br>NO  | Don't split the bounding box into segments for each wagon. |  |                                                                                     |

### 3.13 vehicle.bus.bendy

| #    | DO?      | Description                                                                                                                                                                                      | Image                                                                               |
|------|----------|--------------------------------------------------------------------------------------------------------------------------------------------------------------------------------------------------|-------------------------------------------------------------------------------------|
| 0028 | 👍<br>YES | <p>Buses and shuttles designed to carry more than 10 people and comprises two or more rigid sections linked by a pivoting joint.</p> <p>Annotate each section of the bendy bus individually.</p> |   |
| 0029 | ✗<br>NO  | <p>If you cannot see the pivoting joint of the bus, annotate it as rigid bus.</p>                                                                                                                |   |
| 0030 | ✗<br>NO  | <p>Don't label campervans as bus.</p>                                                                                                                                                            |  |



3.14 vehicle.bus.rigid

| #    | DO?                                                                                       | Description                                                     | Image                                                                                                                                                                                                                                                                                                                                                 |
|------|-------------------------------------------------------------------------------------------|-----------------------------------------------------------------|-------------------------------------------------------------------------------------------------------------------------------------------------------------------------------------------------------------------------------------------------------------------------------------------------------------------------------------------------------|
| 0031 | <br>YES  | Rigid buses and shuttles designed to carry more than 10 people. | <div></div> |
| 0032 | <br>NO | Don't label campervans as bus.                                  |                                                                                                                                                                                                                                                                   |

3.15 vehicle.motorcycle

| #    | DO?                                                                                      | Description                                                                                                                                                                                                                                                                                                                | Image                                                                              |
|------|------------------------------------------------------------------------------------------|----------------------------------------------------------------------------------------------------------------------------------------------------------------------------------------------------------------------------------------------------------------------------------------------------------------------------|------------------------------------------------------------------------------------|
| 0033 | <br>YES | Gasoline or electric powered 2-wheeled vehicle designed to move rapidly (at the speed of standard cars) on the road surface. This category includes all motorcycles, Vespa's and scooters. It also includes light 3-wheel vehicles, often with a light plastic roof and open on the sides, that tend to be common in Asia. |  |

|      |                                                                                         |                                                                                                                             |                                                                                     |  |
|------|-----------------------------------------------------------------------------------------|-----------------------------------------------------------------------------------------------------------------------------|-------------------------------------------------------------------------------------|--|
| 0034 | <br>YES | <p>If there is a rider, include the rider in the box.</p> <p>If there is a passenger, include the passenger in the box.</p> |    |  |
| 0035 | <br>NO | <p>Do NOT include the pedestrian in the annotation if the pedestrian is standing next to the motorcycle.</p>                |  |  |

3.16 vehicle.bicycle

| #    | DO?                                                                                      | Description                                                                                                                                                                                         | Image                                                                                                                                                                                                                                                                                                                                                             |
|------|------------------------------------------------------------------------------------------|-----------------------------------------------------------------------------------------------------------------------------------------------------------------------------------------------------|-------------------------------------------------------------------------------------------------------------------------------------------------------------------------------------------------------------------------------------------------------------------------------------------------------------------------------------------------------------------|
| 0036 | <br>YES | <p>Human or electric powered 2-wheeled vehicle designed to travel at lower speeds either on road surface, sidewalks or bicycle paths.</p> <p>If there is a rider, include the rider in the box.</p> | <div></div> <div></div> |
| 0037 | <br>NO | <p>If there is a pedestrian standing next to the bicycle, do NOT include the pedestrian in the annotation.</p>                                                                                      | <div></div>                                                                                                                                                                                                                                                                    |



3.17 vehicle.emergency.police

| #    | DO?                                                                                      | Description                                                             | Image                                                                                                                                                                                                                                                                                                                                                                                                                                                                                                                                                                                                         |
|------|------------------------------------------------------------------------------------------|-------------------------------------------------------------------------|---------------------------------------------------------------------------------------------------------------------------------------------------------------------------------------------------------------------------------------------------------------------------------------------------------------------------------------------------------------------------------------------------------------------------------------------------------------------------------------------------------------------------------------------------------------------------------------------------------------|
| 0038 | <br>YES | All types of police vehicles including police bicycles and motorcycles. |        |

3.18 vehicle.emergency.ambulance

| #    | DO?                                                                                      | Description              | Image                                                                                                                                                                                                                                                                                                                                                   |
|------|------------------------------------------------------------------------------------------|--------------------------|---------------------------------------------------------------------------------------------------------------------------------------------------------------------------------------------------------------------------------------------------------------------------------------------------------------------------------------------------------|
| 0039 | <br>YES | All types of ambulances. | <div></div> |

3.19 vehicle.construction

| #    | DO?                                                                                       | Description                                                                                                                                                           | Image                                                                                                                                                                                                                                                                                                                                                                                                                                                   |
|------|-------------------------------------------------------------------------------------------|-----------------------------------------------------------------------------------------------------------------------------------------------------------------------|---------------------------------------------------------------------------------------------------------------------------------------------------------------------------------------------------------------------------------------------------------------------------------------------------------------------------------------------------------------------------------------------------------------------------------------------------------|
| 0040 | <br>YES  | <p>Vehicles primarily designed for construction. Typically very slow moving or stationary.</p> <p>Cranes and extremities are always included in the bounding box.</p> | <div></div> <div></div> |
| 0041 | <br>NO | <p>Cranes and extremities should be included in the bounding box.</p>                                                                                                 | <div></div>                                                                                                                                                                               |



3.20 vehicle.other

| #    | DO?                                                                                      | Description                                                                              | Image                                                                                |                                                                                       |
|------|------------------------------------------------------------------------------------------|------------------------------------------------------------------------------------------|--------------------------------------------------------------------------------------|---------------------------------------------------------------------------------------|
| 0042 | <br>YES | Do label as “vehicle.other” when the vehicle doesn’t fit in one of the other categories. |    |    |
|      |                                                                                          |                                                                                          |   |                                                                                       |
|      |                                                                                          |                                                                                          |  |  |

3.21 vehicle.ego\_trailer

| #    | DO?                                                                                      | Description                                                                                                                     | Image                                                                              |
|------|------------------------------------------------------------------------------------------|---------------------------------------------------------------------------------------------------------------------------------|------------------------------------------------------------------------------------|
| 0043 | <br>YES | Do label the cyan coloured box as “vehicle.ego_trailer” as this is the attached trailer of the recording vehicle (ego vehicle). |  |

3.22   movable\_object.trafficcone

| #    | DO?                                                                                      | Description                 | Image                                                                                                                                                                                                                                                                                                                                                                                                                                       |
|------|------------------------------------------------------------------------------------------|-----------------------------|---------------------------------------------------------------------------------------------------------------------------------------------------------------------------------------------------------------------------------------------------------------------------------------------------------------------------------------------------------------------------------------------------------------------------------------------|
| 0044 | <br>YES | All types of traffic cones. | <div></div> |

3.23 movable\_object.barrier

| #    | DO?                                                                                      | Description                                                                                                                                                                                                                                                                                                                  | Image                                                                                                                                                                                                                                                                                                                                                   |
|------|------------------------------------------------------------------------------------------|------------------------------------------------------------------------------------------------------------------------------------------------------------------------------------------------------------------------------------------------------------------------------------------------------------------------------|---------------------------------------------------------------------------------------------------------------------------------------------------------------------------------------------------------------------------------------------------------------------------------------------------------------------------------------------------------|
| 0045 | <br>YES | <p>Any metal, concrete or water barrier temporarily placed in the scene in order to re-direct vehicle or pedestrian traffic. In particular, includes barriers used at construction zones.</p> <p>If there are multiple barriers either connected or just placed next to each other, they should be annotated separately.</p> | <div></div> |

|      |         |                                                                  |                                                                                                                                                                                                                                                                                             |
|------|---------|------------------------------------------------------------------|---------------------------------------------------------------------------------------------------------------------------------------------------------------------------------------------------------------------------------------------------------------------------------------------|
| 0046 | ✗<br>NO | If barriers are installed permanently, then do NOT include them. | <div data-bbox="698 162 1232 429" data-label="Image"></div> <div data-bbox="1240 92 1774 493" data-label="Image"></div> |
|------|---------|------------------------------------------------------------------|---------------------------------------------------------------------------------------------------------------------------------------------------------------------------------------------------------------------------------------------------------------------------------------------|



3.24 movable\_object.pushable\_pullable

| #    | DO?                                                                                      | Description                                                                                                                                                                                                          | Image                                                                                                                                                                                                                                                                                                                                                                                                                                                                                                                        |
|------|------------------------------------------------------------------------------------------|----------------------------------------------------------------------------------------------------------------------------------------------------------------------------------------------------------------------|------------------------------------------------------------------------------------------------------------------------------------------------------------------------------------------------------------------------------------------------------------------------------------------------------------------------------------------------------------------------------------------------------------------------------------------------------------------------------------------------------------------------------|
| 0047 | <br>YES | <p>Objects that a pedestrian may push or pull. For example dolly's, wheel barrows, garbage-bins with wheels, or shopping carts.</p> <p>Typically not designed to carry humans. It's meant to be moved by people.</p> | <div></div> |

3.25 movable\_object.debris

| #    | DO?                                                                                      | Description                                                                                                                                                                                                                                                         | Image                                                                              |
|------|------------------------------------------------------------------------------------------|---------------------------------------------------------------------------------------------------------------------------------------------------------------------------------------------------------------------------------------------------------------------|------------------------------------------------------------------------------------|
| 0048 | <br>YES | <p>Debris or movable object that is left on the driveable that is too large to be driven over safely, e.g. tree branch, full trash bag etc.</p> <p>It's not meant to be moved by people and it's only on the street or sidewalk when there is potential danger.</p> |  |



3.26 static\_object.bicycle Rack

| #    | DO? | Description                                                                                                                                                            | Image                                                                                                                                                                                                             |
|------|-----|------------------------------------------------------------------------------------------------------------------------------------------------------------------------|-------------------------------------------------------------------------------------------------------------------------------------------------------------------------------------------------------------------|
| 0049 | YES | Area or device intended to park or secure the bicycles in a row. It includes all the bicycles parked in it and any empty slots that are intended for parking bicycles. | <br>                                           |
| 0050 | NO  | Bicycles that are not part of the rack should not be included. Instead they should be annotated as bicycles separately.                                                |  <p>This is not a bike rack, since it should be annotated as bicycle</p> <p>This is a bike rack</p> <p>This is a bike rack</p> |

3.27 static\_object.traffic\_sign

| #    | DO?                                                                                       | Description                                                   | Image                                                                                                                                                                                                                                                                            |
|------|-------------------------------------------------------------------------------------------|---------------------------------------------------------------|----------------------------------------------------------------------------------------------------------------------------------------------------------------------------------------------------------------------------------------------------------------------------------|
| 0051 | <br>YES  | Use class traffic sign for the objects on the right.          | <div></div> <div></div> |
| 0052 | <br>NO | Don't use this class for signs that are not driving relevant. |                                                                                                                                                                                                                                                                                  |

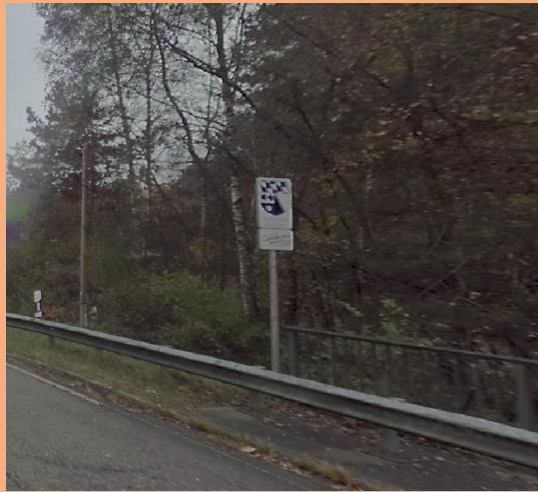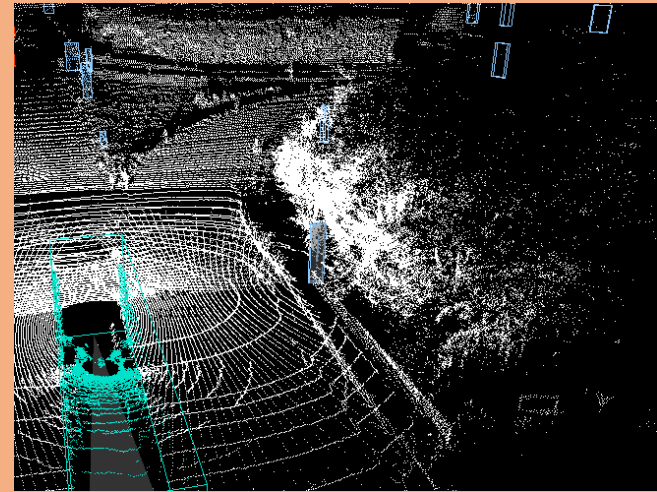

Supplement: supplementary_material [file attachment]
