# Supplementary material
Source: ML conference proceedings conference paper supplement (https://openreview.net/forum?id=X8ItT6mGKF)
Supplement: supplementary_material [file attachment]

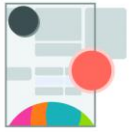

## MAN TruckScenes

MAN TruckScenes is the first large-scale multimodal dataset for autonomous trucking. It consists of 747 scenes from typical long-haul truck environments and provides multimodal data with long-range annotations. The dataset comprises data from a state-of-the-art sensor suite, including multiple high-resolution cameras, lidar, and radar sensors to provide full coverage of the surrounding area, along with a high-precision GNSS and two IMU units to support a multitude of applications. MAN TruckScenes covers a large geographical area, three seasons of the year, day and nighttime driving, as well as numerous different weather conditions, including fog, rain, and snow. The dataset includes scenes in logistics terminals and recordings of vehicles with high relative velocities on the German Autobahn to promote the unique challenges of long-haul trucks.

### DATASET LINK

[www.man.eu/truckscenes](https://www.man.eu/truckscenes)

### DATA CARD AUTHOR(S)

Fent, Felix  
Kuttenreich, Fabian  
Ruch, Florian  
Rizwin, Farija  
Juergens, Stefan

### LICENSE TYPE

**CC BY-NC-SA 4.0**

## Authorship

### Publishers

| PUBLISHING ORGANIZATION(S)     | INDUSTRY TYPE(S) | CONTACT DETAIL(S)                                                                                                                                                                                                                 |
|--------------------------------|------------------|-----------------------------------------------------------------------------------------------------------------------------------------------------------------------------------------------------------------------------------|
| MAN Truck & Bus SE             | Corporate - Tech | <b>Contact:</b> MAN Truck & Bus SE<br>Dachauer Straße 667<br>80995 München<br><br><b>Mail:</b> truckscenes@man.eu<br><br><b>Website:</b> www.man.eu                                                                               |
| Technical University of Munich | Academic - Tech  | <b>Affiliation:</b> Institute of Automotive Technology<br>School of Engineering & Design<br><br><b>Contact:</b> Technical University of Munich<br>Boltzmannstr. 15<br>85748 Garching<br><br><b>Website:</b> www.mos.ed.tum.de/ftm |

### Dataset Owners

| CONTACT DETAIL(S)                                                                                                                                                                                                 | AUTHOR(S)                                                                                                                                                                                                                                                                                                                                                                                                                                                                                                    |
|-------------------------------------------------------------------------------------------------------------------------------------------------------------------------------------------------------------------|--------------------------------------------------------------------------------------------------------------------------------------------------------------------------------------------------------------------------------------------------------------------------------------------------------------------------------------------------------------------------------------------------------------------------------------------------------------------------------------------------------------|
| <b>Dataset Owner:</b><br>MAN Truck & Bus SE<br><br><b>Contact:</b><br>MAN Truck & Bus SE<br>Dachauer Straße 667<br>80995 München<br><br><b>E-Mail:</b><br>truckscenes@man.eu<br><br><b>Website:</b><br>www.man.eu | Fent, Felix – Technical University of Munich<br><br>Kuttenreich, Fabian – MAN Truck & Bus SE<br><br>Ruch, Florian – MAN Truck & Bus SE<br><br>Rizwin, Farija – MAN Truck & Bus SE<br><br>Juergens, Stefan – MAN Truck & Bus SE<br><br>Lechermann, Lorenz – MAN Truck & Bus SE<br><br>Nissler, Christian – MAN Truck & Bus SE<br><br>Perl, Andrea – MAN Truck & Bus SE<br><br>Voll, Ulrich – MAN Truck & Bus SE<br><br>Yan, Min – MAN Truck & Bus SE<br><br>Lienkamp, Markus – Technical University of Munich |

## Funding Sources

INSTITUTION(S)

FUNDING OR GRANT SUMMARY(IES)

Federal Ministry for  
Economic Affairs and  
Climate Action

*Partially funded by the government-supported ATLAS-L4 project with grand no. 19A21048I.*

| Dataset Overview              |                                  |                                                                                                                                                                                                                                                                                                                                                                                                                            |
|-------------------------------|----------------------------------|----------------------------------------------------------------------------------------------------------------------------------------------------------------------------------------------------------------------------------------------------------------------------------------------------------------------------------------------------------------------------------------------------------------------------|
| DATA SUBJECT                  | DATASET SNAPSHOT                 | CONTENT DESCRIPTION                                                                                                                                                                                                                                                                                                                                                                                                        |
| Data about places and objects | Size of Dataset                  | 784 GB                                                                                                                                                                                                                                                                                                                                                                                                                     |
|                               | Number of Scenes                 | 747                                                                                                                                                                                                                                                                                                                                                                                                                        |
|                               | Number of Sample                 | 29862                                                                                                                                                                                                                                                                                                                                                                                                                      |
|                               | Number of Sample Data            | 6230622                                                                                                                                                                                                                                                                                                                                                                                                                    |
|                               | Number of Sample Annotation      | 1013090                                                                                                                                                                                                                                                                                                                                                                                                                    |
|                               | Number of Instances              | 53866                                                                                                                                                                                                                                                                                                                                                                                                                      |
|                               | Number of Sensors                | 18                                                                                                                                                                                                                                                                                                                                                                                                                         |
|                               | Number of Calibrated Sensors     | 18                                                                                                                                                                                                                                                                                                                                                                                                                         |
|                               | Number of Categories             | 27                                                                                                                                                                                                                                                                                                                                                                                                                         |
|                               | Number of Attributes             | 15                                                                                                                                                                                                                                                                                                                                                                                                                         |
|                               | Number of Visibilities           | 4                                                                                                                                                                                                                                                                                                                                                                                                                          |
|                               | Number of Tags                   | 34                                                                                                                                                                                                                                                                                                                                                                                                                         |
|                               | Average Annotations Per Sample   | 33.93                                                                                                                                                                                                                                                                                                                                                                                                                      |
|                               | Average Annotations Per Instance | 18.81                                                                                                                                                                                                                                                                                                                                                                                                                      |
|                               | Algorithmic Annotations          | 0                                                                                                                                                                                                                                                                                                                                                                                                                          |
|                               | Human Annotations                | 1013090                                                                                                                                                                                                                                                                                                                                                                                                                    |
| Sensitivity of Data           |                                  |                                                                                                                                                                                                                                                                                                                                                                                                                            |
| SENSITIVITY TYPE(S)           | FIELD(S) WITH SENSITIVE DATA     | SECURITY AND PRIVACY HANDLING                                                                                                                                                                                                                                                                                                                                                                                              |
| Anonymous Data                | <b>Anonymized Sensitive Data</b> |                                                                                                                                                                                                                                                                                                                                                                                                                            |
|                               | Field Name                       | Description                                                                                                                                                                                                                                                                                                                                                                                                                |
|                               | Sample Data                      | Camera sensor data contains human faces and vehicle registration plates                                                                                                                                                                                                                                                                                                                                                    |
|                               | Ego Pose                         | GNSS data contains position and timestamp information                                                                                                                                                                                                                                                                                                                                                                      |
|                               | Ego Motion Cabin                 | IMU data contains timestamp information                                                                                                                                                                                                                                                                                                                                                                                    |
|                               | Ego Motion Chassis               | IMU data contains timestamp information                                                                                                                                                                                                                                                                                                                                                                                    |
|                               |                                  | <p><b>Blurring:</b> All human faces and vehicle registration plates have been blurred in all camera images. The anonymization was done automatically and has been checked manually. This process was subject to a dual control cycle.</p> <p><b>Randomization:</b> All timestamps were randomly changed, but temporal consistency was ensured.</p> <p><b>Additional Notes:</b> All sensitive data has been anonymized.</p> |

| Dataset Version and Maintenance                                                                                                                                  |                                                             |                                                                                                                                                                                                                                                                             |
|------------------------------------------------------------------------------------------------------------------------------------------------------------------|-------------------------------------------------------------|-----------------------------------------------------------------------------------------------------------------------------------------------------------------------------------------------------------------------------------------------------------------------------|
| MAINTENANCE STATUS                                                                                                                                               | VERSION DETAILS                                             | MAINTENANCE PLAN                                                                                                                                                                                                                                                            |
| Actively Maintained<br>(No new versions will be made available, but this dataset will be actively maintained, including but not limited to updates to the data.) | <b>Current Version:</b> 1.0<br><b>Release Date:</b> 06/2024 | <b>Versioning:</b> New versions will be made available if significantly new features are added to the dataset.<br><br><b>Errors:</b> Errors will be eliminated and result in a minor version update.<br><br><b>Feedback:</b> Feedback can be given as issues in the devkit. |

# Data Points

| PRIMARY DATA MODALITY                | DATA FIELDS             |                                                                                                                                                                                                           |
|--------------------------------------|-------------------------|-----------------------------------------------------------------------------------------------------------------------------------------------------------------------------------------------------------|
| Multimodal<br>(Camera, Lidar, Radar) | File Name               | Description                                                                                                                                                                                               |
|                                      | attribute.json          | An attribute is a property of an instance that can change while the category remains the same.                                                                                                            |
|                                      | calibrated_sensor.json  | Definition of a particular sensor as calibrated on a particular vehicle. All extrinsic parameters are given with respect to the ego vehicle body frame. All camera images come undistorted and rectified. |
|                                      | category.json           | Taxonomy of object categories. Subcategories are delineated by a period                                                                                                                                   |
|                                      | ego_motion_cabin.json   | Ego vehicle cabin motion at a particular timestamp. Given with respect to vehicle coordinate system.                                                                                                      |
|                                      | ego_motion_chassis.json | Ego vehicle chassis motion at a particular timestamp. Given with respect to vehicle coordinate system.                                                                                                    |
|                                      | ego_pose.json           | Ego vehicle pose at a particular timestamp. Given with respect to global coordinate system.                                                                                                               |
|                                      | instance.json           | An object instance tracked across sample.                                                                                                                                                                 |
|                                      | sample.json             | A sample is an annotated keyframe at 2 Hz.                                                                                                                                                                |
|                                      | sample_annotation.json  | A bounding box defining the position of an object seen in a sample. All location data is given with respect to the global coordinate system.                                                              |
|                                      | sample_data.json        | A sensor data object.                                                                                                                                                                                     |
|                                      | scene.json              | A scene is a 20s long sequence of consecutive frames extracted from a measurement drive.                                                                                                                  |
|                                      | sensor.json             | A specific sensor type.                                                                                                                                                                                   |
|                                      | visibility.json         | The visibility of an instance is the fraction of annotation visible in all 4 images. Binned into 4 bins.                                                                                                  |

## DATA FIELD DEFINITION(S)

```
attribute
...
attribute {
  "token":           <str> -- Unique record identifier.
  "name":            <str> -- Attribute name.
  "description":     <str> -- Attribute description.
}
...
```

#### calibrated\_sensor

```
calibrated_sensor {  
  "token":          <str> -- Unique record identifier.  
  "sensor_token":   <str> -- Foreign key pointing to the sensor type.  
  "translation":    <float> [3] -- Coordinate system origin in meters: x, y, z.  
  "rotation":       <float> [4] -- Coordinate system orientation as quaternion:  
                      w, x, y, z.  
  "camera_intrinsic": <float> [3, 3] -- Intrinsic camera calibration. Empty for  
                      sensors that are not cameras.  
}
```

#### category

```
category {  
  "token":          <str> -- Unique record identifier.  
  "name":           <str> -- Category name. Subcategories indicated by period.  
  "description":    <str> -- Category description.  
  "index":          <int> -- The index of the label used for efficiency  
                      reasons.  
}
```

#### ego\_motion\_cabin

```
ego_motion_cabin {  
  "token":          <str> -- Unique record identifier.  
  "timestamp":      <int> -- Unix time stamp.  
  "vx":             <float> -- Velocity in x direction given in meters per  
                      second (m/s).  
  "vy":             <float> -- Velocity in y direction given in meters per  
                      second (m/s).  
  "vz":             <float> -- Velocity in z direction given in meters per  
                      second (m/s).  
  "ax":             <float> -- Acceleration in x direction given in meters per  
                      second squared (m/s^2).  
  "ay":             <float> -- Acceleration in y direction given in meters per  
                      second squared (m/s^2).  
  "az":             <float> -- Acceleration in z direction given in meters per  
                      second squared (m/s^2).  
  "yaw":            <float> -- Yaw angle around the z axis given in rad.  
  "pitch":          <float> -- Pitch angle around the y axis given in rad.  
  "roll":           <float> -- Roll angle around the x axis given in rad.  
  "yaw_rate":       <float> -- Yaw rate around the z axis given in rad per  
                      second.  
  "pitch_rate":     <float> -- Pitch rate around the z axis given in rad per  
                      second.  
  "roll_rate":      <float> -- Roll rate around the z axis given in rad per  
                      second.  
}...
```

## ego\_motion\_chassis

```
ego_motion_chassis {
  "token":          <str> -- Unique record identifier.
  "timestamp":      <int> -- Unix time stamp.
  "vx":             <float> -- Velocity in x direction given in meters per
                    second (m/s).
  "vy":             <float> -- Velocity in y direction given in meters per
                    second (m/s).
  "vz":             <float> -- Velocity in z direction given in meters per
                    second (m/s).
  "ax":             <float> -- Acceleration in x direction given in meters per
                    second squared (m/s^2).
  "ay":             <float> -- Acceleration in y direction given in meters per
                    second squared (m/s^2).
  "az":             <float> -- Acceleration in z direction given in meters per
                    second squared (m/s^2).
  "yaw":            <float> -- Yaw angle around the z axis given in rad.
  "pitch":          <float> -- Pitch angle around the y axis given in rad.
  "roll":           <float> -- Roll angle around the x axis given in rad.
  "yaw_rate":       <float> -- Yaw rate around the z axis given in rad per
                    second.
  "pitch_rate":     <float> -- Pitch rate around the z axis given in rad per
                    second.
  "roll_rate":      <float> -- Roll rate around the z axis given in rad per
                    second.
}
...
```

## ego\_pose

```
...
ego_pose {
  "token":          <str> -- Unique record identifier.
  "translation":    <float> [3] -- Coordinate system origin in meters: x, y, z.
                    Note that z is always 0.
  "rotation":       <float> [4] -- Coordinate system orientation as quaternion:
                    w, x, y, z.
  "timestamp":      <int> -- Unix time stamp.
}
...
```

## instance

```
...
instance {
  "token":          <str> -- Unique record identifier.
  "category_token": <str> -- Foreign key pointing to the object category.
  "nbr_annotations": <int> -- Number of annotations of this instance.
  "first_annotation_token": <str> -- Foreign key. Points to the first annotation of
                                this instance.
  "last_annotation_token": <str> -- Foreign key. Points to the last annotation of this
                                instance.
}
...
```



sample

```
...
sample {
  "token":          <str> -- Unique record identifier.
  "timestamp":      <int> -- Unix time stamp.
  "scene_token":    <str> -- Foreign key pointing to the scene.
  "next":           <str> -- Foreign key. Sample that follows this in time.
                    Empty if end of scene.
  "prev":           <str> -- Foreign key. Sample that precedes this in time.
                    Empty if start of scene.
}
...
```

sample\_annotation

```
...
sample_annotation {
  "token":          <str> -- Unique record identifier.
  "sample_token":    <str> -- Foreign key. NOTE: this points to a sample NOT a
                    sample_data since annotations are done on the sample level
                    taking all relevant sample_data into account.
  "instance_token":  <str> -- Foreign key. Which object instance is this
                    annotating. An instance can have multiple annotations over
                    time.
  "attribute_tokens": <str> [n] -- Foreign keys. List of attributes for this
                    annotation. Attributes can change over time, so they belong
                    here, not in the instance table.
  "visibility_token": <str> -- Foreign key. Visibility may also change over time.
                    If no visibility is annotated, the token is an empty
                    string.
  "translation":     <float> [3] -- Bounding box location in meters as center_x,
                    center_y, center_z.
  "size":            <float> [3] -- Bounding box size in meters as width,
                    length, height.
  "rotation":        <float> [4] -- Bounding box orientation as quaternion: w,
                    x, y, z.
  "num_lidar_pts":   <int> -- Number of lidar points in this box. Points are
                    counted during the lidar sweep identified with this sample.
  "num_radar_pts":   <int> -- Number of radar points in this box. Points are
                    counted during the radar sweep identified with this sample.
                    This number is summed across all radar sensors without any
                    invalid point filtering.
  "next":            <str> -- Foreign key. Sample annotation from the same
                    object instance that follows this in time. Empty if this is
                    the last annotation for this object.
  "prev":            <str> -- Foreign key. Sample annotation from the same
                    object instance that precedes this in time. Empty if this
                    is the first annotation for this object.
}
...
```

## sample\_data

```
...
sample_data {
  "token":           <str> -- Unique record identifier.
  "sample_token":    <str> -- Foreign key. Associated Sample of this sample_data
  "ego_pose_token":  <str> -- Foreign key.
  "calibrated_sensor_token": <str> -- Foreign key.
  "filename":        <str> -- Relative path to data-blob on disk.
  "fileformat":      <str> -- Data file format.
  "width":           <int> -- If the sample data is an image, this is the image
                        width in pixels.
  "height":          <int> -- If the sample data is an image, this is the image
                        height in pixels.
  "timestamp":       <int> -- Unix time stamp.
  "is_key_frame":    <bool> -- True if sample_data is part of key_frame.
  "next":            <str> -- Foreign key. Sample data from the same sensor that
                        follows this in time. Empty if end of scene.
  "prev":            <str> -- Foreign key. Sample data from the same sensor that
                        precedes this in time. Empty if start of scene.
}
...
```

## scene

```
...
scene {
  "token":           <str> -- Unique record identifier.
  "name":            <str> -- Short string identifier.
  "description":      <str> -- List of scene tags according to seven distinct
                        categories separated by semicolon.
  "log_token":        <str> -- Foreign key. Always empty.
  "nbr_samples":      <int> -- Number of samples in this scene.
  "first_sample_token": <str> -- Foreign key. Points to the first sample in scene.
  "last_sample_token": <str> -- Foreign key. Points to the last sample in scene.
}
...
```

## sensor

```
...
sensor {
  "token":           <str> -- Unique record identifier.
  "channel":         <str> -- Sensor channel name.
  "modality":        <str> {camera, lidar, radar} -- Sensor modality.
}
...
```

## visibility

```
...
visibility {
  "token":           <str> -- Unique record identifier.
  "level":           <int> -- Visibility level.
  "description":     <str> -- Description of visibility level.
}
...
```

# Motivations & Intentions

## Motivations

| PURPOSE(S) | DOMAIN(S) OF APPLICATION                                                                                          | MOTIVATING FACTOR(S)                                                                                                                                                                                                                                                                                                                                                                            |
|------------|-------------------------------------------------------------------------------------------------------------------|-------------------------------------------------------------------------------------------------------------------------------------------------------------------------------------------------------------------------------------------------------------------------------------------------------------------------------------------------------------------------------------------------|
| Research   | Autonomous Driving, Perception, Machine Learning, Computer Vision, Object Detection, Object Tracking, Prediction. | <ul style="list-style-type: none"><li>- Providing the first multimodal dataset for autonomous trucking.</li><li>- Allow the research community to come into contact with truck-specific challenges, such as trailer occlusions, novel sensor perspectives, and terminal environments for the first time.</li><li>- Providing the first dataset with 4D radar data with 360° coverage.</li></ul> |

## Intended Use

| DATASET USE(S)        | SUITABLE USE CASE(S)                                                                                                                                                                                                                                                                                                                                                                                                                                                                                                                 | UNSUITABLE USE CASE(S)                               |
|-----------------------|--------------------------------------------------------------------------------------------------------------------------------------------------------------------------------------------------------------------------------------------------------------------------------------------------------------------------------------------------------------------------------------------------------------------------------------------------------------------------------------------------------------------------------------|------------------------------------------------------|
| Safe for research use | <p><b>Object Detection:</b> Localization and classification of objects in 3D space.</p> <p><b>Object Tracking:</b> Tracking of 3D objects across time.</p> <p><b>Object Prediction:</b> Prediction of object tracks in 3D space.</p> <p><b>Scene Classification:</b> Classification of environmental conditions.</p> <p><b>Additional Notes:</b> The dataset can also be used for localization, mapping, ego-trailer detection, and articulation angle estimation, even if it was not specifically designed for these use cases.</p> | <p><b>Additional Notes:</b> Currently not known.</p> |

|  | RESEARCH AND PROBLEM SPACE(S) | CITATION GUIDELINES                                                                                                                                                                                                                                                                                                                                                                                                                                                                    |
|--|-------------------------------|----------------------------------------------------------------------------------------------------------------------------------------------------------------------------------------------------------------------------------------------------------------------------------------------------------------------------------------------------------------------------------------------------------------------------------------------------------------------------------------|
|  | Autonomous driving perception | <pre>``` @article{fent2024,   title={MAN TruckScenes: A multimodal dataset for autonomous trucking in diverse conditions},   author={Fent, Felix and Kутtenreich, Fabian and Ruch, Florian and Rizwin, Farija and Juergens, Stefan and Lechermann, Lorenz and Nissler, Christian and Perl, Andrea and Voll, Ulrich and Yan, Min and Lienkamp, Markus},   journal={Proceedings of the Neural Information Processing Systems Track on Datasets and Benchmark},   year={2024} } ```</pre> |

## Access, Retention, & Wipeout

### Access

| ACCESS TYPE            | DOCUMENTATION LINK(S)                                                                                            | PREREQUISITE(S)                                                                                   |
|------------------------|------------------------------------------------------------------------------------------------------------------|---------------------------------------------------------------------------------------------------|
| External - Open Access | <a href="http://www.man.eu/truckscenes">www.man.eu/truckscenes</a><br>[Github URL]                               | None                                                                                              |
|                        | POLICY LINK(S)                                                                                                   | ACCESS CONTROL LIST(S)                                                                            |
|                        | MAN TruckScenes is part of the AWS Open Data Sponsorship Program. The Terms and Conditions of the program apply. | Unrestricted access. Access control and compliance with sanctions and embargos is handled by AWS. |

### Retention

|  | DURATION                                                                                                        | POLICY SUMMARY                                           |
|--|-----------------------------------------------------------------------------------------------------------------|----------------------------------------------------------|
|  | The dataset availability is guaranteed for at least two years. We aim for a permanent provision of the dataset. | Data retention is subject to the AWS Open Data policies. |

| Provenance                                                                                                                                                       |                                                                                                                                                                                                                                                                                                                                                                                                                                                                                                                                                                                   |                                                                                                                                                                                                                                    |
|------------------------------------------------------------------------------------------------------------------------------------------------------------------|-----------------------------------------------------------------------------------------------------------------------------------------------------------------------------------------------------------------------------------------------------------------------------------------------------------------------------------------------------------------------------------------------------------------------------------------------------------------------------------------------------------------------------------------------------------------------------------|------------------------------------------------------------------------------------------------------------------------------------------------------------------------------------------------------------------------------------|
| Collection                                                                                                                                                       |                                                                                                                                                                                                                                                                                                                                                                                                                                                                                                                                                                                   |                                                                                                                                                                                                                                    |
| METHOD(S) USED                                                                                                                                                   | METHODOLOGY DETAIL(S)                                                                                                                                                                                                                                                                                                                                                                                                                                                                                                                                                             | SOURCE DESCRIPTION(S)                                                                                                                                                                                                              |
| OEM Collection Efforts                                                                                                                                           | <p><b>OEM Collection Efforts</b></p> <p><b>Platform:</b> MAN autonomous test truck</p> <p><b>Is this source considered sensitive or high-risk?</b> No</p> <p><b>Dates of Collection:</b> [08 2023- 01 2024]</p> <p><b>Primary modality of collected data:</b><br/>Multimodal (Camera, Lidar, Radar)</p> <p><b>Update Frequency for collected data:</b><br/>Static</p>                                                                                                                                                                                                             | <p><b>MAN:</b> Recorded the sensor data and selected the scenes.</p> <p><b>b-plus:</b> Handled the data annotation and quality assurance.</p>                                                                                      |
| Collection Criteria                                                                                                                                              |                                                                                                                                                                                                                                                                                                                                                                                                                                                                                                                                                                                   |                                                                                                                                                                                                                                    |
| DATA SELECTION                                                                                                                                                   | DATA INCLUSION                                                                                                                                                                                                                                                                                                                                                                                                                                                                                                                                                                    | DATA EXCLUSION                                                                                                                                                                                                                     |
| <p><b>Measurement Drives:</b><br/>Measurement drives are part of a dedicated measurement campaign with specially trained test drivers in diverse conditions.</p> | <p><b>Novel Category:</b> Recording of an object category that was previously not included in the dataset.</p> <p><b>Novel Tag:</b> Recording of a scene tag (environmental condition) that was previously not included in the dataset.</p> <p><b>Novel Attribute:</b> Recording of an object attribute that was previously not included in the dataset.</p> <p><b>Anormal Scene:</b> Anormal situation due to the present objects, maneuver, or environment.</p> <p><b>Additional Notes:</b> The selected data should represent long-haul trucks’ operational design domain.</p> | <p><b>Corrupted Data:</b> All data that contains dropouts, invariant sampling frequencies, drifts, or synchronization errors are excluded.</p> <p><b>Additional Notes:</b> Data quality is checked automatically and manually.</p> |

# Extended Use

## Use with Other Data

| SAFETY LEVEL                | KNOWN SAFE DATASET(S) OR DATA TYPE(S)                                                                                                                                                                                                                                                                                             | BEST PRACTICES                                                                                      |
|-----------------------------|-----------------------------------------------------------------------------------------------------------------------------------------------------------------------------------------------------------------------------------------------------------------------------------------------------------------------------------|-----------------------------------------------------------------------------------------------------|
| Safe to use with other data | <p><b>Autonomous Driving Datasets:</b> Safe to use with other autonomous driving datasets (like nuScenes, Waymo Open Dataset, etc.) for benchmarking, pretraining, or domain adaptation.</p> <p><b>Computer Vision Datasets:</b> Safe to use with other computer vision datasets (like COCO, ImageNet, etc.) for pretraining.</p> | Note that different datasets use different metrics or different configurations of the same metrics. |

## Use in ML or AI Systems

| DATASET USE(S)                            | NOTABLE FEATURE(S)                                                                                                                               | USAGE GUIDELINE(S)                                                                                                                         |            |            |           |      |            |  |
|-------------------------------------------|--------------------------------------------------------------------------------------------------------------------------------------------------|--------------------------------------------------------------------------------------------------------------------------------------------|------------|------------|-----------|------|------------|--|
| Training<br><br>Validation<br><br>Testing | <b>Tutorial:</b> [Link to Tutorial]                                                                                                              | <b>Usage Guidelines:</b> The dataset is provided for training and validation purposes. The annotations of the test data are not published. |            |            |           |      |            |  |
|                                           | DISTRIBUTION(S)                                                                                                                                  |                                                                                                                                            |            |            |           |      |            |  |
|                                           | <table><tr><td>Train</td><td>523 Scenes</td></tr><tr><td>Validation</td><td>75 Scenes</td></tr><tr><td>Test</td><td>149 Scenes</td></tr></table> | Train                                                                                                                                      | 523 Scenes | Validation | 75 Scenes | Test | 149 Scenes |  |
| Train                                     | 523 Scenes                                                                                                                                       |                                                                                                                                            |            |            |           |      |            |  |
| Validation                                | 75 Scenes                                                                                                                                        |                                                                                                                                            |            |            |           |      |            |  |
| Test                                      | 149 Scenes                                                                                                                                       |                                                                                                                                            |            |            |           |      |            |  |

## SPLIT STATISTICS

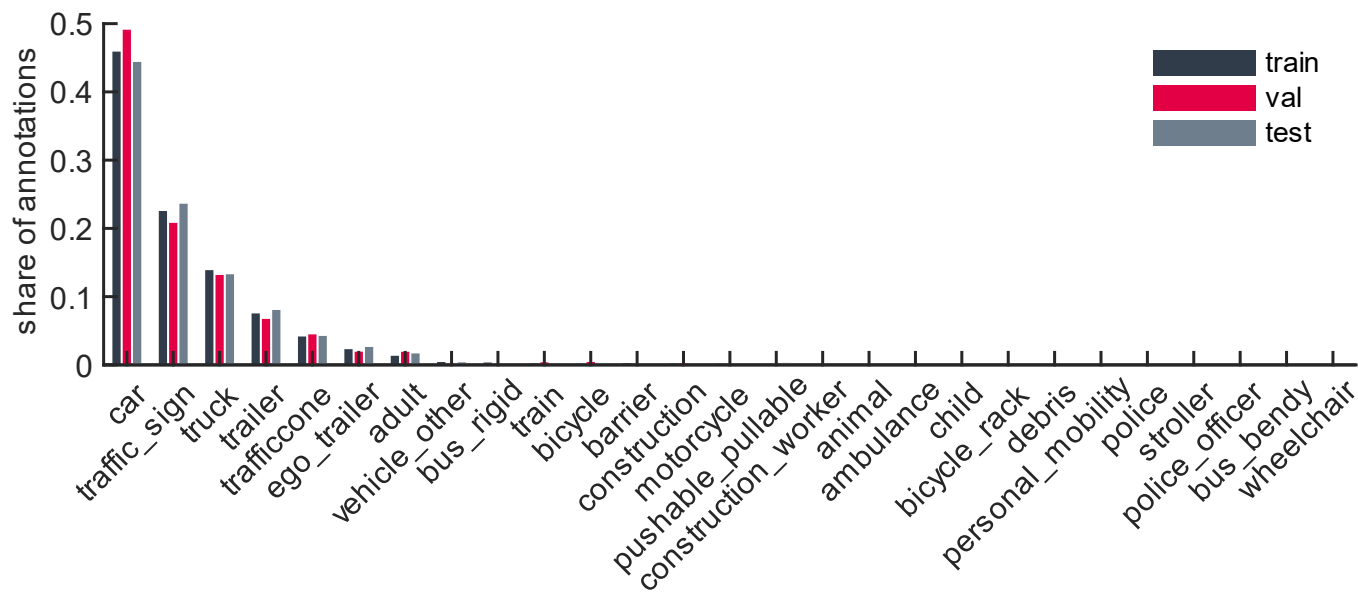

# Transformations

## Synopsis

| TRANSFORMATION(S) APPLIED                  | FIELD(S) TRANSFORMED                                                                                                                                                                                                                                                                                                                                  | LIBRARY(IES) AND METHOD(S) USED                           |      |             |                                                           |             |                                     |                                                                                                                                                                                                                                                                        |           |                  |          |                    |          |                                                                                                                                                                                                                                                                                                                                                                                                                                                                                                    |
|--------------------------------------------|-------------------------------------------------------------------------------------------------------------------------------------------------------------------------------------------------------------------------------------------------------------------------------------------------------------------------------------------------------|-----------------------------------------------------------|------|-------------|-----------------------------------------------------------|-------------|-------------------------------------|------------------------------------------------------------------------------------------------------------------------------------------------------------------------------------------------------------------------------------------------------------------------|-----------|------------------|----------|--------------------|----------|----------------------------------------------------------------------------------------------------------------------------------------------------------------------------------------------------------------------------------------------------------------------------------------------------------------------------------------------------------------------------------------------------------------------------------------------------------------------------------------------------|
| Converting Data Types<br><br>Anonymization | <b>Converting Data Types</b> <table><tr><th>Field Name</th><th>Data</th></tr><tr><td>Sample Data</td><td>Camera images<br/>Lidar point clouds<br/>Radar point clouds</td></tr><tr><td>Ego Pose</td><td>GNSS data</td></tr></table>                                                                                                                    | Field Name                                                | Data | Sample Data | Camera images<br>Lidar point clouds<br>Radar point clouds | Ego Pose    | GNSS data                           | <b>Converting Data Types</b><br><br><b>Method:</b> Convert image data to a pinhole camera model and JPEG image compression.<br><br><b>Platforms, tools, or libraries:</b><br>Open Computer Vision Library (OpenCV)<br><br><b>Method:</b> Point cloud data compression. |           |                  |          |                    |          |                                                                                                                                                                                                                                                                                                                                                                                                                                                                                                    |
|                                            | Field Name                                                                                                                                                                                                                                                                                                                                            | Data                                                      |      |             |                                                           |             |                                     |                                                                                                                                                                                                                                                                        |           |                  |          |                    |          |                                                                                                                                                                                                                                                                                                                                                                                                                                                                                                    |
|                                            | Sample Data                                                                                                                                                                                                                                                                                                                                           | Camera images<br>Lidar point clouds<br>Radar point clouds |      |             |                                                           |             |                                     |                                                                                                                                                                                                                                                                        |           |                  |          |                    |          |                                                                                                                                                                                                                                                                                                                                                                                                                                                                                                    |
|                                            | Ego Pose                                                                                                                                                                                                                                                                                                                                              | GNSS data                                                 |      |             |                                                           |             |                                     |                                                                                                                                                                                                                                                                        |           |                  |          |                    |          |                                                                                                                                                                                                                                                                                                                                                                                                                                                                                                    |
|                                            | <b>Anonymization</b> <table><tr><th>Field Name</th><th>Data</th></tr><tr><td>Sample</td><td>Meta data</td></tr><tr><td>Sample Data</td><td>Camera images<br/>Lidar point clouds</td></tr><tr><td>Ego Pose</td><td>GNSS data</td></tr><tr><td>Ego Motion Cabin</td><td>IMU data</td></tr><tr><td>Ego Motion Chassis</td><td>IMU data</td></tr></table> | Field Name                                                | Data | Sample      | Meta data                                                 | Sample Data | Camera images<br>Lidar point clouds | Ego Pose                                                                                                                                                                                                                                                               | GNSS data | Ego Motion Cabin | IMU data | Ego Motion Chassis | IMU data | <b>Platforms, tools, or libraries:</b><br>Point Cloud Library (PCL)<br><br><b>Method:</b> GNSS coordinate system transformation.<br><br><b>Platforms, tools, or libraries:</b><br>utm<br><br><b>Anonymization</b><br><br><b>Method:</b> Blurring of human faces and vehicle registration plates in camera image data.<br><br><b>Platforms, tools, or libraries:</b><br>Open Computer Vision Library (OpenCV)<br><br><b>Method:</b> Randomization of timestamp information in meta and sensor data. |
|                                            | Field Name                                                                                                                                                                                                                                                                                                                                            | Data                                                      |      |             |                                                           |             |                                     |                                                                                                                                                                                                                                                                        |           |                  |          |                    |          |                                                                                                                                                                                                                                                                                                                                                                                                                                                                                                    |
|                                            | Sample                                                                                                                                                                                                                                                                                                                                                | Meta data                                                 |      |             |                                                           |             |                                     |                                                                                                                                                                                                                                                                        |           |                  |          |                    |          |                                                                                                                                                                                                                                                                                                                                                                                                                                                                                                    |
|                                            | Sample Data                                                                                                                                                                                                                                                                                                                                           | Camera images<br>Lidar point clouds                       |      |             |                                                           |             |                                     |                                                                                                                                                                                                                                                                        |           |                  |          |                    |          |                                                                                                                                                                                                                                                                                                                                                                                                                                                                                                    |
|                                            | Ego Pose                                                                                                                                                                                                                                                                                                                                              | GNSS data                                                 |      |             |                                                           |             |                                     |                                                                                                                                                                                                                                                                        |           |                  |          |                    |          |                                                                                                                                                                                                                                                                                                                                                                                                                                                                                                    |
|                                            | Ego Motion Cabin                                                                                                                                                                                                                                                                                                                                      | IMU data                                                  |      |             |                                                           |             |                                     |                                                                                                                                                                                                                                                                        |           |                  |          |                    |          |                                                                                                                                                                                                                                                                                                                                                                                                                                                                                                    |
| Ego Motion Chassis                         | IMU data                                                                                                                                                                                                                                                                                                                                              |                                                           |      |             |                                                           |             |                                     |                                                                                                                                                                                                                                                                        |           |                  |          |                    |          |                                                                                                                                                                                                                                                                                                                                                                                                                                                                                                    |

## Breakdown of Transformations

| CONVERTING DATA TYPES                        | METHOD(S) USED                                                                                                                                                                                                                                                                                |
|----------------------------------------------|-----------------------------------------------------------------------------------------------------------------------------------------------------------------------------------------------------------------------------------------------------------------------------------------------|
| Camera image data conversion and compression | The camera data of the four camera sensors undergo an undistortion process using a pinhole camera model and a Lanczos interpolation scheme with an 8 x 8 kernel and constant padding values. The resulting image is cropped to a 1980 x 943 pixel size and stored as a compressed JPEG image. |
| Lidar point cloud data compression           | The point cloud data is stored as binary (Marc Lehmann’s LZ4) compressed data in the point cloud data (pcd) format.                                                                                                                                                                           |
| GNSS coordinate system transformation        | The GNSS data is transformed to a UTM-WGS84 coordinate system and mapped to cell U32.                                                                                                                                                                                                         |



| ANONYMIZATION                                                  | METHOD(S) USED                                                                                                                                           |
|----------------------------------------------------------------|----------------------------------------------------------------------------------------------------------------------------------------------------------|
| <b>Blurring of human faces and vehicle registration plates</b> | Human faces and vehicle registration plates are blurred using a polynomial blurring method, which is not further specified to avoid reverse engineering. |
| <b>Randomization of timestamp information</b>                  | All timestamps within the meta and sensor data are anonymized randomly. However, temporal consistency is guaranteed for all samples and sensor data.     |

# Annotations & Labeling

| ANNOTATION WORKFORCE TYPE  | ANNOTATION CHARACTERISTIC(S)                                                                            | ANNOTATION DESCRIPTION(S)                                                                                                                                                                                                                                                                                                                    |
|----------------------------|---------------------------------------------------------------------------------------------------------|----------------------------------------------------------------------------------------------------------------------------------------------------------------------------------------------------------------------------------------------------------------------------------------------------------------------------------------------|
| Human Annotations (Expert) | Annotations are made in the form of 3D bounding boxes, object attributes, tracking IDs, and scene tags. |                                                                                                                                                                                                                                                                                                                                              |
|                            | Number of Annotations                                                                                   | 1013090                                                                                                                                                                                                                                                                                                                                      |
|                            | Number of Instances                                                                                     | 53866                                                                                                                                                                                                                                                                                                                                        |
|                            | Average Annotations Per Sample                                                                          | 33.93                                                                                                                                                                                                                                                                                                                                        |
|                            | Average Annotations Per Instance                                                                        | 18.81                                                                                                                                                                                                                                                                                                                                        |
|                            |                                                                                                         | <b>Instance:</b> An object instance tracked across samples.<br><br><b>Category:</b> A category is a property of an instance that cannot change over time.<br><br><b>Attribute:</b> An attribute is a property of an instance that can change over time.<br><br><b>Scene Tag:</b> Property of a scene that describes the current environment. |

## ANNOTATION DISTRIBUTION(S)

Category Distribution

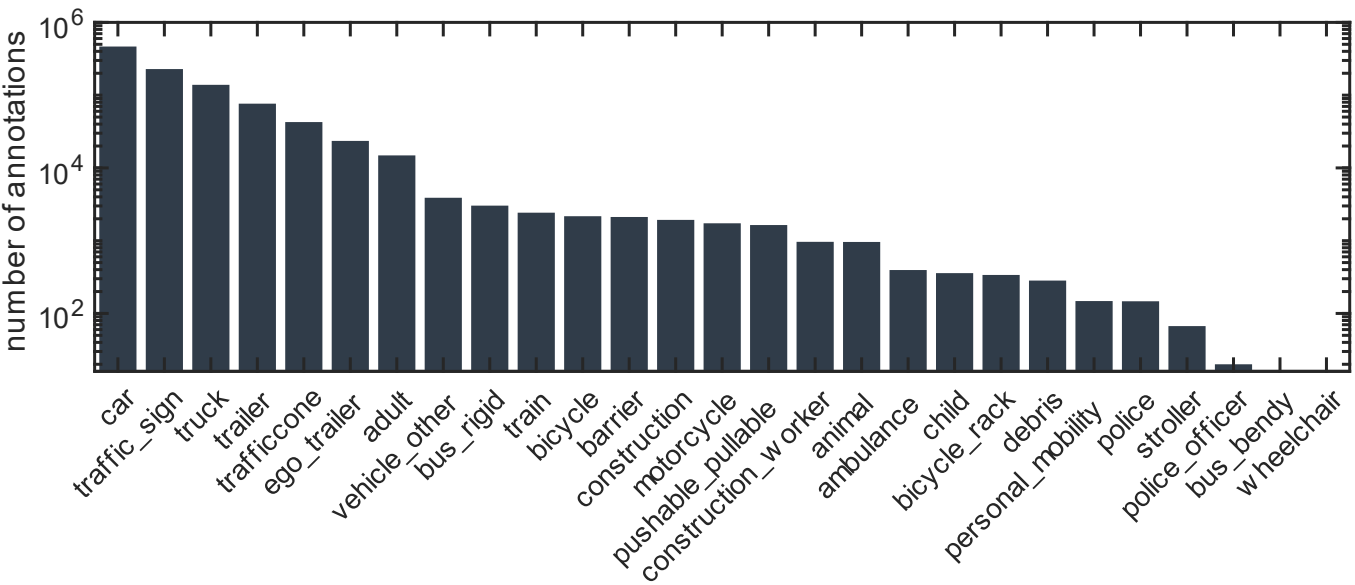

Attribute Distribution

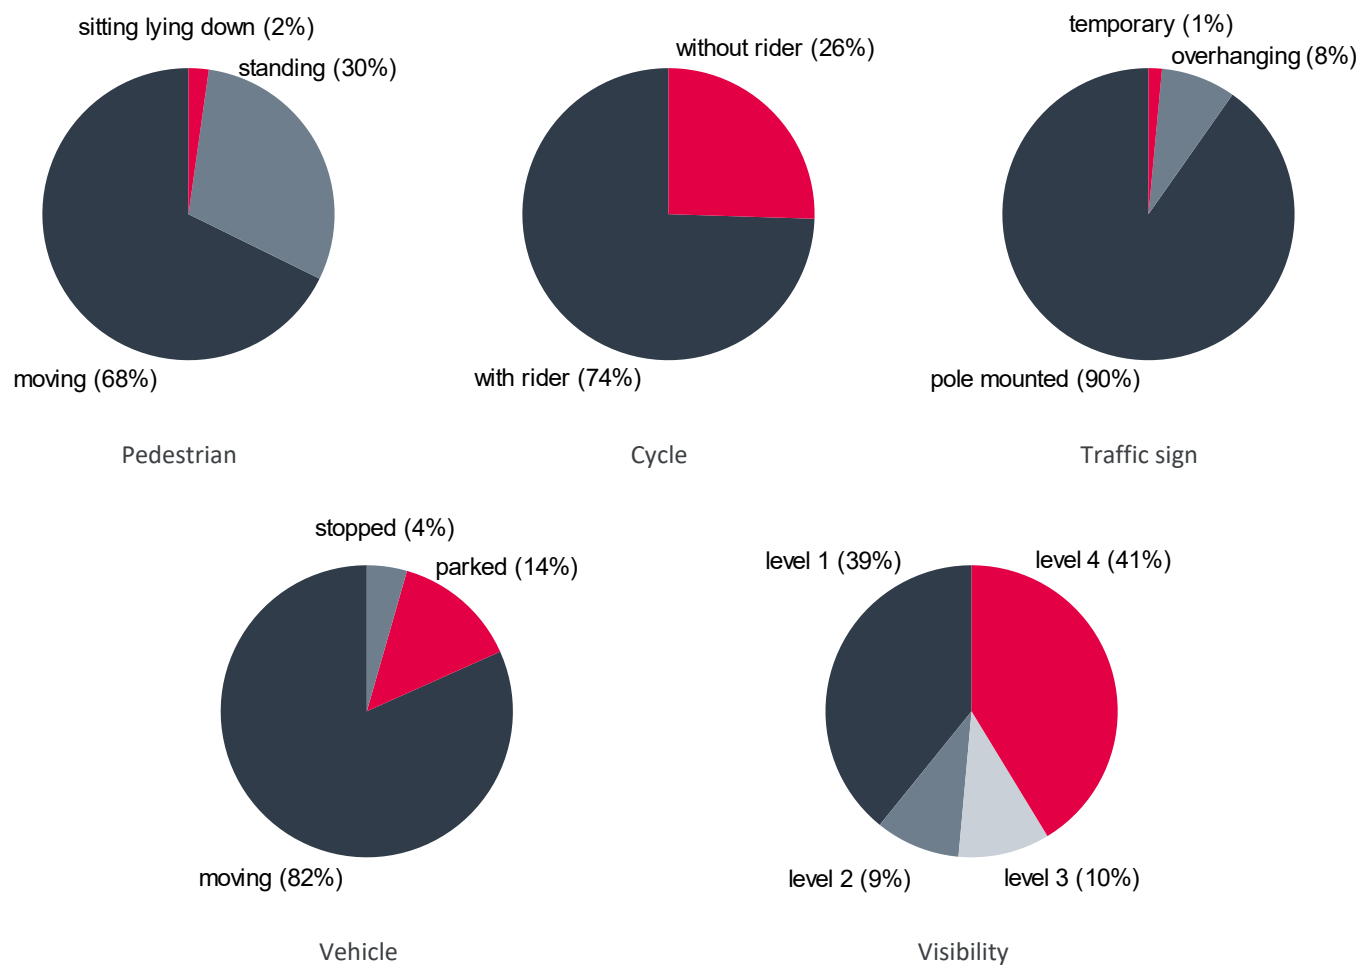

Scene Tag Distribution

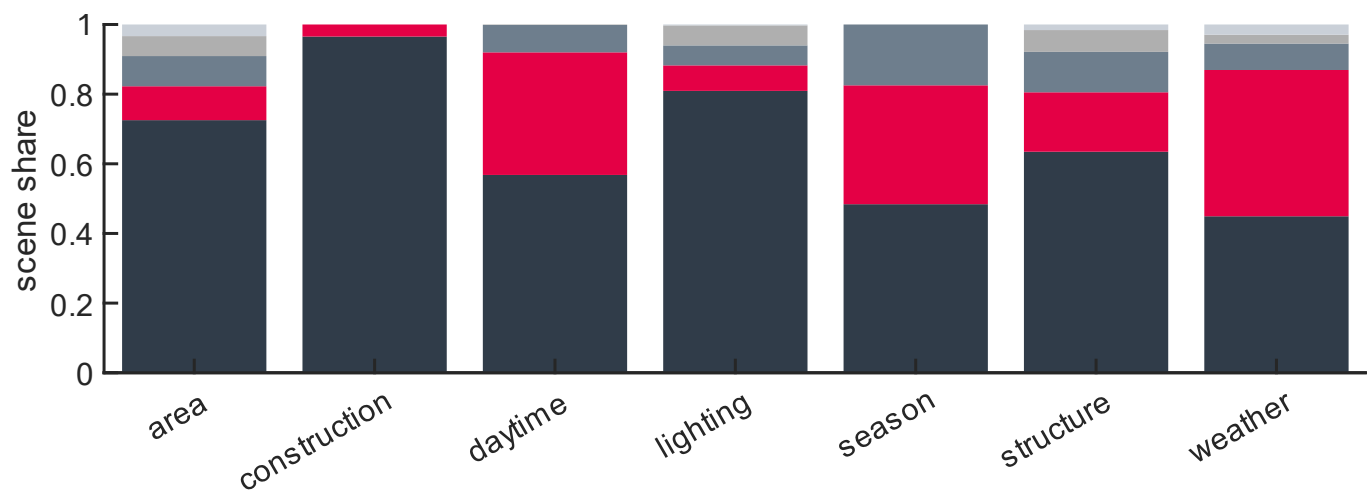

# Validation Types

| METHOD(S)                | BREAKDOWN(S)                                                                      | DESCRIPTION(S)                                                                                                                                                        |
|--------------------------|-----------------------------------------------------------------------------------|-----------------------------------------------------------------------------------------------------------------------------------------------------------------------|
| Consistency Validation   | <b>Consistency Validation</b><br><b>Number of Data Points Validated:</b> 7732152  | <b>Consistency Validation</b><br><b>Method:</b> Automated validation of the sensor capturing frequency, sampling frequency, data dropouts, and data integrity.        |
| Annotation Validation    | <b>Annotation Validation</b><br><b>Number of Data Points Validated:</b> 1013090   | <b>Annotation Validation</b><br><b>Method:</b> Manual and automated validation of the annotation category, position, size, orientation, attributes, and tracking IDs. |
| Anonymization Validation | <b>Anonymization Validation</b><br><b>Number of Data Points Validated:</b> 600848 | <b>Anonymization Validation</b><br><b>Method:</b> Manual validation of the anonymization of human faces and vehicle registration plates.                              |

## Version

1.0

Initial Release.

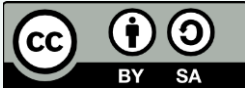

The [Data Cards Playbook ↗](#) by Google Research is licensed under a Creative Commons Attribution-ShareAlike 4.0 International License.

You are free to share and adapt this work under the [appropriate license terms ↗](#).
