# Supplementary material
Source: ML conference proceedings conference paper supplement (https://openreview.net/forum?id=X8ItT6mGKF)
Supplement: supplementary_material [file attachment]

# OS0

## Ultra-Wide View High-Resolution Imaging Lidar

**FIRMWARE VERSION: 3.x**

**HARDWARE VERSION: REV7**

### SUMMARY

The short range OS0 delivers 35 m range on a dark 10% target and an ultra-wide 90° vertical field-of-view delivering an industry-leading combination of price, performance, reliability, size, weight, and power. The OS0 is designed for all-weather environments and due to its small size, can be easily integrated into autonomous vehicles, heavy machinery, robots, drones, and mapping solutions.

### HIGHLIGHTS

- 100% increase in range with the new L3 Chip
- Dual Return mode
- Calibrated reflectivity
- Fixed resolution per frame
- Camera-grade near-infrared and signal data
- Multi-sensor crosstalk suppression
- Open source ROS and C++ drivers
- Ouster SDK for software development

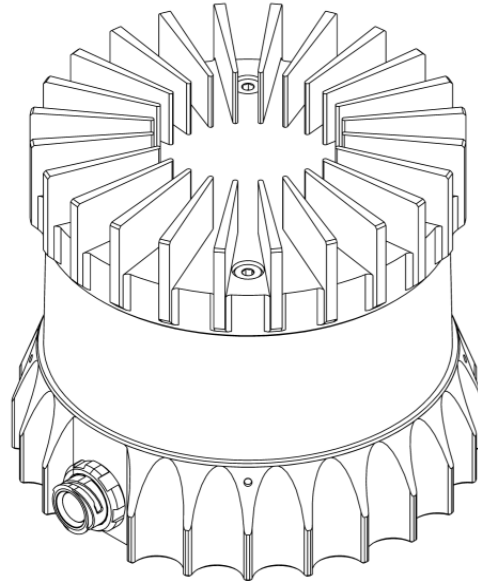

### OPTICAL PERFORMANCE

|                                                              |                                                                                      |
|--------------------------------------------------------------|--------------------------------------------------------------------------------------|
| Range<br>(80% Lambertian reflectivity,<br>1024 @ 10 Hz mode) | 75 m @ 100 klx sunlight, >90% detection probability                                  |
| Range<br>(10% Lambertian reflectivity,<br>1024 @ 10 Hz mode) | 35 m @ 100 klx sunlight, >90% detection probability                                  |
| Minimum Range                                                | 0.5 m (to be reduced in FW 3.1)                                                      |
| Vertical Resolution                                          | 32, 64, or 128 channels                                                              |
| Horizontal Resolution                                        | 512, 1024, or 2048 (configurable)                                                    |
| Rotation Rate                                                | 10 or 20 Hz (configurable)                                                           |
| Field of View                                                | Vertical: 90° (+45° to -45°)<br>Horizontal: 360°                                     |
| Angular Sampling Accuracy                                    | Vertical: ±0.01° / Horizontal: ±0.01°                                                |
| False Positive Rate                                          | 1/10,000                                                                             |
| Range Resolution                                             | 0.1 cm<br><b>Note:</b> For <i>Low Data Rate Profile</i> the Range Resolution = 0.8cm |
| # of Returns                                                 | 2 (strongest, second strongest)                                                      |

|                                                                                                                                                                              |                                                                                                                                                    |
|------------------------------------------------------------------------------------------------------------------------------------------------------------------------------|----------------------------------------------------------------------------------------------------------------------------------------------------|
| <p>Precision<br/>(Typical on Lambertian and Retroreflective, 1024 @ 10 Hz mode, 1 standard deviation)</p>                                                                    | <p>Min: <math>\pm 0.8</math> cm, Max: <math>\pm 4</math> cm</p> 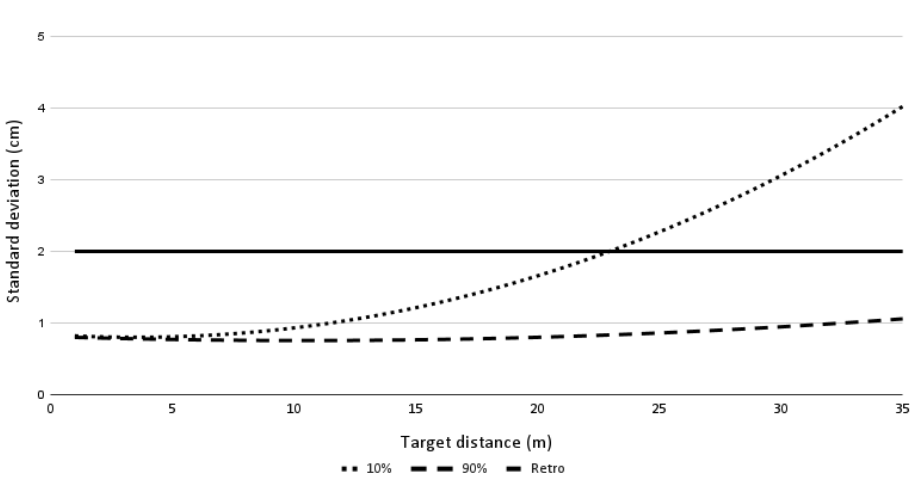 |
| <p>Range Accuracy<br/><b>Note:</b> "Accuracy is calculated based on the error between the mean of 100 measurements on static target at a given range and the true range"</p> |                                                                 |

**LASER**

|                              |                                           |
|------------------------------|-------------------------------------------|
| Laser Product Class          | Class 1 eye-safe per IEC/EN 60825-1: 2014 |
| Laser Wavelength             | 865 nm                                    |
| Beam Diameter Exiting Sensor | 5 mm                                      |
| Beam Divergence              | 0.35° (FWHM)                              |

**LIDAR OUTPUT**

|                                                                                     |                                                                                                    |
|-------------------------------------------------------------------------------------|----------------------------------------------------------------------------------------------------|
| Connection                                                                          | UDP over gigabit Ethernet                                                                          |
| Points Per Second                                                                   | 1,310,720 (32 channel)<br>2,621,440 (64 channel)<br>5,242,880 (128 channel)                        |
| Data Rate (Megabits Per Second) (Legacy Mode) 2048x10                               | 66 Mbps (32 channel)<br>129 Mbps (64 channel)<br>254 Mbps (128 channel)                            |
| Data Rate (Megabits per second) (Dual Return Profile at highest resolution 2048x10) | up to 86.55 Mbps (32 channel)<br>up to 170.43 Mbps (64 channel)<br>up to 338.20 Mbps (128 channel) |

|                                                            |                                                                                                 |
|------------------------------------------------------------|-------------------------------------------------------------------------------------------------|
| Data Rate (Megabits per second)<br>(Low Data Rate Profile) | up to 23.6 Mbps (32 channel)<br>up to 44.6 Mbps (64 channel)<br>up to 86.6 Mbps (128 channel)   |
| Data Rate (Megabits per second)<br>(Single Return Profile) | up to 65.6 Mbps (32 channel)<br>up to 128.5 Mbps (64 channel)<br>up to 254.3 Mbps (128 channel) |
| Data Per Point                                             | Range, signal, reflectivity, near-infrared, channel, azimuth angle, timestamp                   |
| Timestamp Resolution                                       | < 1 $\mu$ s                                                                                     |
| Data Latency                                               | < 10 ms                                                                                         |

### IMU OUTPUT

|                      |                                                                                                                                                                                                    |
|----------------------|----------------------------------------------------------------------------------------------------------------------------------------------------------------------------------------------------|
| Connection           | UDP over 1000Base-T or 1000Base-T1                                                                                                                                                                 |
| Samples Per Second   | 100                                                                                                                                                                                                |
| Data Per Sample      | 3 axis gyro, 3 axis accelerometer                                                                                                                                                                  |
| Timestamp Resolution | < 1 $\mu$ s                                                                                                                                                                                        |
| Data Latency         | < 10 ms                                                                                                                                                                                            |
| Additional Details   | InvenSense IAM-20680HT; datasheet for more details:<br><a href="https://invensense.tdk.com/download-pdf/iam-20680ht-datasheet/">https://invensense.tdk.com/download-pdf/iam-20680ht-datasheet/</a> |

### CONTROL INTERFACE

|                            |                                                                                                                                                                                                                                                                                                                                                                                                                                                         |
|----------------------------|---------------------------------------------------------------------------------------------------------------------------------------------------------------------------------------------------------------------------------------------------------------------------------------------------------------------------------------------------------------------------------------------------------------------------------------------------------|
| Connection                 | TCP and HTTP APIs                                                                                                                                                                                                                                                                                                                                                                                                                                       |
| Time Synchronization       | Input sources: <ul style="list-style-type: none"> <li>• IEEE1588 Precision Time Protocol (PTP); Accuracy: &lt;1 ms error</li> <li>• gPTP; Accuracy: &lt;1 ms error</li> <li>• NMEA \$GPRMC UART message support</li> <li>• External PPS; Accuracy: &lt;1 ms error</li> <li>• Internal 10 ppm drift clock; Accuracy: &lt;20 ppm error</li> </ul> Output sources: <ul style="list-style-type: none"> <li>• Configurable 1 - 60 Hz output pulse</li> </ul> |
| Lidar Operating Modes      | Hardware-triggered angle firing (guaranteed fixed resolution per rotation): <ul style="list-style-type: none"> <li>• x 512 @ 10 Hz or 20 Hz</li> <li>• x 1024 @ 10 Hz or 20 Hz</li> <li>• x 2048 @ 10 Hz</li> </ul>                                                                                                                                                                                                                                     |
| Additional Programmability | Multi-sensor Phase Lock<br>Azimuth Masking<br>Low-power Standby Mode<br>Queryable intrinsic calibration information: <ul style="list-style-type: none"> <li>• Beam angles</li> <li>• IMU pose correction matrix</li> </ul>                                                                                                                                                                                                                              |

### MECHANICAL/ELECTRICAL

|                   |                                                                                                                                                                                        |
|-------------------|----------------------------------------------------------------------------------------------------------------------------------------------------------------------------------------|
| Power Consumption | 14 - 20 W (22 W peak at startup, 28 W peak if operating at -40 °C)<br><b>Note:</b> Ouster recommends use of a power brick (no less than 30 W) if using in extreme outdoor conditions." |
| Connector         | Proprietary pluggable connector (Power + data + DIO)                                                                                                                                   |

|                   |                                                                                                                                                                                                                                                                                                                                                                                                                                                                                             |
|-------------------|---------------------------------------------------------------------------------------------------------------------------------------------------------------------------------------------------------------------------------------------------------------------------------------------------------------------------------------------------------------------------------------------------------------------------------------------------------------------------------------------|
| Operating Voltage | <ul style="list-style-type: none"> <li>• Suitable for 12VDC and 24VDC Nominal systems.</li> <li>• <b>Not</b> suitable for 48V nominal battery based systems.</li> <li>• Under voltage conditions/alarms occur at 9.5VDC at connector.</li> <li>• Over voltage conditions/alarms occur at 51VDC at connector.</li> <li>• Overvoltage lockout onset at 58VDC (<math>\pm 1V</math>) at connector.</li> <li>• Overvoltage lockout release: 55VDC (<math>\pm 1V</math>) at connector.</li> </ul> |
| Dimensions        | Diameter: 87 mm (3.42 in)<br>Height: <ul style="list-style-type: none"> <li>• Without cap: 58.35 mm (2.3 in)</li> <li>• With thermal cap: 74.2 mm (2.9 in)</li> </ul>                                                                                                                                                                                                                                                                                                                       |
| Weight            | Without cap: 430 g (15.1 oz)<br>With radial cap: 500 g (17.6 oz)<br>With halo cap: 445 g (15.6 oz)                                                                                                                                                                                                                                                                                                                                                                                          |
| Mounting          | Bottom: 4x M3 screws, 2x locating 2 mm pin holes<br>Top: 4x M3 screws, 4x locating 2 mm pin holes, 1x M6 screw                                                                                                                                                                                                                                                                                                                                                                              |

### OPERATIONAL

|                       |                                                                                                                                                                                                                                                                                                                                                                                                                                                                                                                                                                                                                                                                                                                                                                                                                                                                                                                                                                                        |
|-----------------------|----------------------------------------------------------------------------------------------------------------------------------------------------------------------------------------------------------------------------------------------------------------------------------------------------------------------------------------------------------------------------------------------------------------------------------------------------------------------------------------------------------------------------------------------------------------------------------------------------------------------------------------------------------------------------------------------------------------------------------------------------------------------------------------------------------------------------------------------------------------------------------------------------------------------------------------------------------------------------------------|
| Operating Temperature | -40 °C to +60 °C (with mount)<br>Between +53 °C and +60 °C, sensor automatically reduces range (max 20% range reduction)                                                                                                                                                                                                                                                                                                                                                                                                                                                                                                                                                                                                                                                                                                                                                                                                                                                               |
| Storage Temperature   | -40 °C to +105 °C                                                                                                                                                                                                                                                                                                                                                                                                                                                                                                                                                                                                                                                                                                                                                                                                                                                                                                                                                                      |
| Ingress Protection    | IP68 (1m submersion for 1 hour, with I/O cable attached)<br>IP69K (with I/O cable attached)                                                                                                                                                                                                                                                                                                                                                                                                                                                                                                                                                                                                                                                                                                                                                                                                                                                                                            |
| Shock                 | IEC 60068-2-27 (Amplitude: 100 g, Shape: 11 ms half-sine, 3 shocks x 6 directions)                                                                                                                                                                                                                                                                                                                                                                                                                                                                                                                                                                                                                                                                                                                                                                                                                                                                                                     |
| Vibration             | IEC 60068-2-64 (Amplitude: 3 G-rms, Shape: 10 - 1000 Hz, Mounting: sprung masses, 3 axes w/ 8 hr duration each)                                                                                                                                                                                                                                                                                                                                                                                                                                                                                                                                                                                                                                                                                                                                                                                                                                                                        |
| Compliance            | <p>For US<br/> Laser Safety:<br/> <ul style="list-style-type: none"> <li>• IEC/EN 60825-1:2014 Class 1 eye safe</li> <li>• FDA US 21CFR1040 Notice 56 Class 1</li> </ul> </p> <p>Product Safety:<br/> <ul style="list-style-type: none"> <li>• UL 62368-1</li> <li>• CSA 22.2 No. 62368-1-19</li> </ul> </p> <p>EMC: FCC 47CFR Part 15, Subpart B, Class A</p> <p>For EU<br/> Laser Safety: IEC/EN 60825-1:2014 Class 1 eye safe</p> <p>Product Safety: EN/IEC 62368-1</p> <p>EMC:<br/> <ul style="list-style-type: none"> <li>• EN 55032:2012/AC 2013; CISPR 32:2015</li> <li>• EN 55024:2010; CISPR 24:2010</li> <li>• EN 61000-3-2:2014</li> <li>• EN 61000-3-3:2013</li> </ul> </p> <p><b>Note:</b> Ouster UK (Ltd): 125 Princes Street, Edinburgh EH2 4AD, Scotland, United Kingdom<br/> Contact: Neil Calder, Phone Number: +44(0).131.563.9078</p> <div style="text-align: center;">  </div> |

**ACCESSORIES**

|               |                                                                                                          |
|---------------|----------------------------------------------------------------------------------------------------------|
| Interface Box | Polycarb/FR4, 100 g, 75 mm x 50 mm x 25 mm (LxWxH), 2 m CAT6 cable, 24 V power adapter, 5 m sensor cable |
| Mount         | Aluminum, 530 g, 110 mm x 110 mm x 20.5 mm (LxWxH), 4 x M8 thru holes                                    |

**SOFTWARE**

|                |                      |
|----------------|----------------------|
| Sample Drivers | Ouster SDK, ROS, C++ |
|----------------|----------------------|

**EXTERIOR DIMENSIONS**

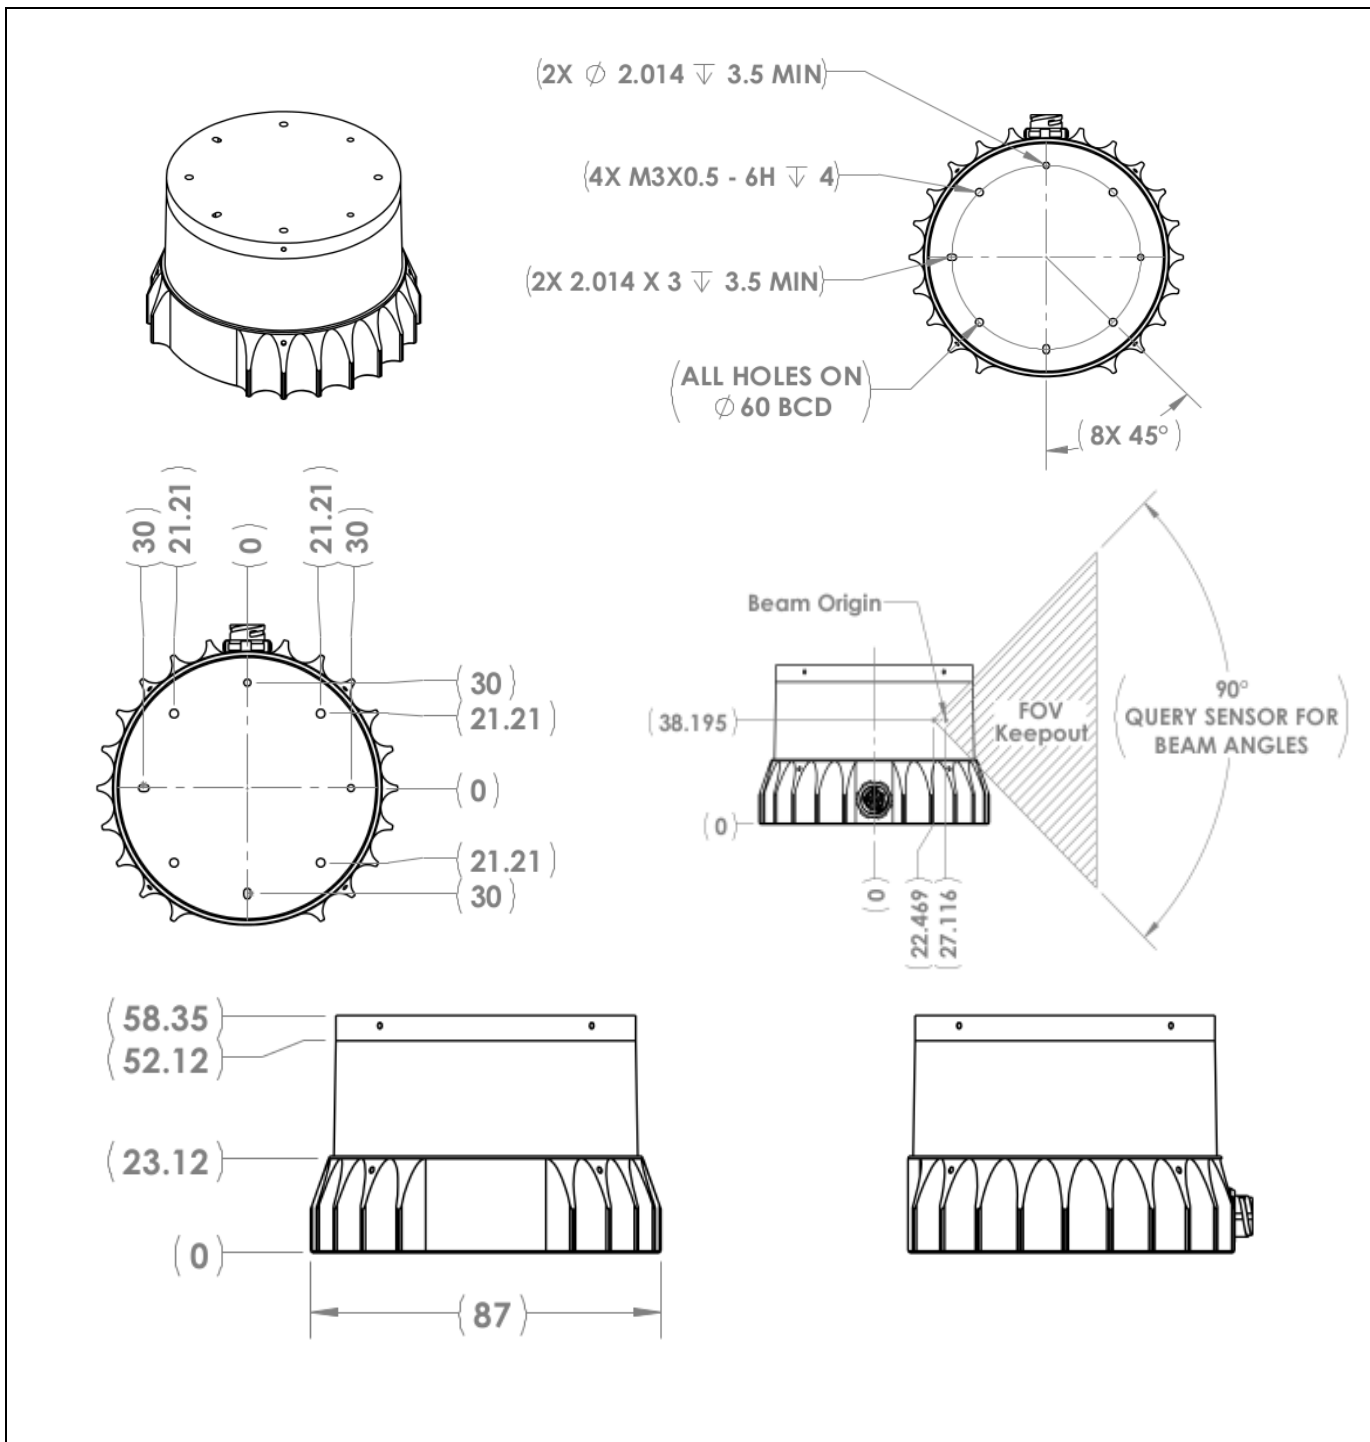

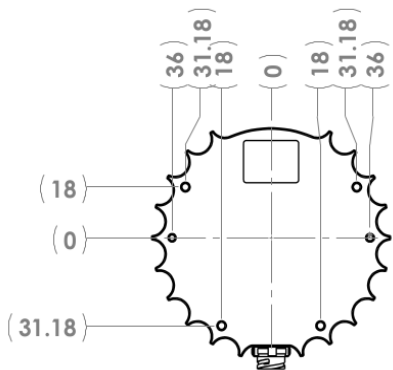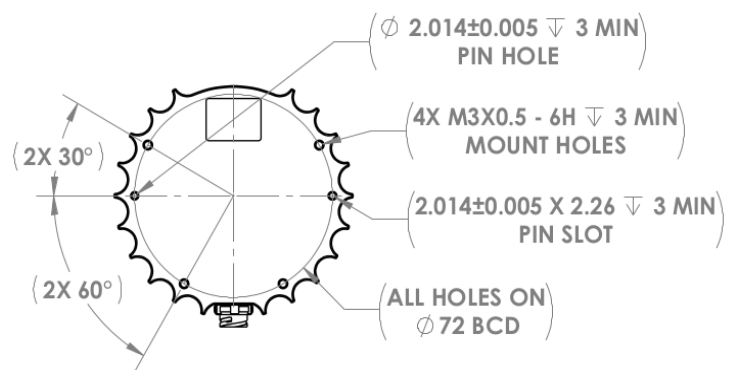

\*Specifications are subject to change without notice.

WWW.OUSTER.COM

REV: 06/26/2023 • © 2023 Ouster, Inc. • All rights reserved
