# Supplementary material
Source: ML conference proceedings conference paper supplement (https://openreview.net/forum?id=X8ItT6mGKF)
Supplement: supplementary_material [file attachment]

# ADMA-G-Pro+ v35

*GNSS/INS System with highest performance level*

**The fiber optic gyro system ADMA-G-Pro+ with three fiber optic gyro sensors and three servo acceleration sensors class 1 mg provide high-precision data even in the case of strong GNSS interferences. Complies with all international test standards e.g. Euro NCAP & NHTSA.**

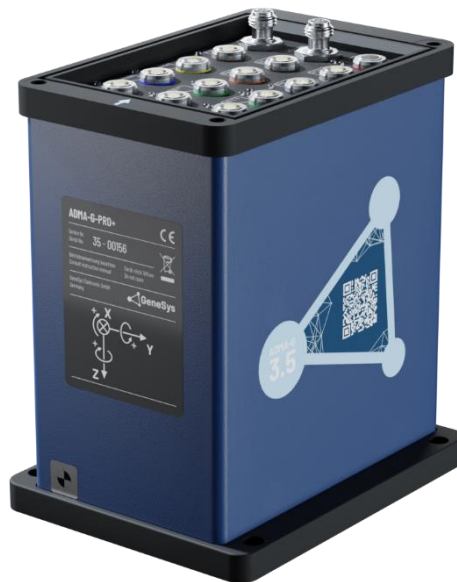

**0.01 m**

Position accuracy ( $1\sigma$ )<sup>2</sup>

**0.03 km/h**

Velocity accuracy (RMS)<sup>3</sup>

**0.015°**

Heading accuracy ( $1\sigma$ )<sup>2</sup>

**0.01°**

Roll/Pitch accuracy ( $1\sigma$ )<sup>2</sup>

**< 1.0 mg**

Sensor

**< 1 ms**

Data latency

**1 kHz**

Data output rate

## APPLICATIONS

Strap-down technology ensures that the ADMA is stable and resistant to unwanted vibration during use. This makes the ADMA ideal for evaluating vehicle dynamics and driver assistance systems in the automotive sector. The ADMA system is also successfully used in motorsport, driverless systems and construction machinery. It has a proven track record in road and railway measurements.

- Validation of simulation models
- Autonomous Vehicle (AV) validation
- Euro NCAP ADAS Evaluation e.g., ACC, FCW, AEB (VRU, Car2Car), LSS (LDW, LKA)
- NHTSA Evaluation
- Simultaneous Localization and Mapping (SLAM)
- Validation of predictive vehicle safety functions with e.g., Camera, Radar, Lidar sensors
- Driving and steering robot applications

## ADMA ADD-ONS AND OPTIONS

**Meet new measurement and testing requirements with Add-Ons and Options.**

The new generation of ADMA 3.5 devices now allows our customers to meet their new and changing needs. Our focus is on straight-forward use and increased productivity. The Add-Ons and Options can be activated quickly and conveniently by entering a license key. This is possible at any time without modifications to the hardware. A high degree of flexibility is thus ensured.

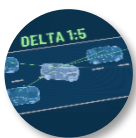

**Add-On DELTA 1:5**  
Relative data calculation via WiFi in real-time for multi-vehicle operation

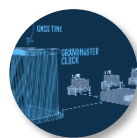

**Add-On PTP**  
Time synchronization with generalized Precision Time Protocol (gPTP)

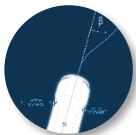

**Add-On LATDEV**  
Real-time calculation of the lateral deviation

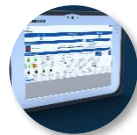

**Add-On BRAKING**  
Real-time calculation of brake performance data according to international regulations

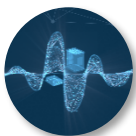

**Add-On FILTER**  
Option for online signal filtering

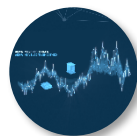

**Add-On Smoothing**  
Define maximum step size for the GNSS signal

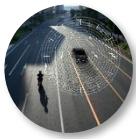

### Option RTK2

High-precision position measurement using correction data

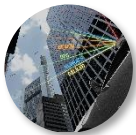

### Option Multi-GNSS

Multi-GNSS: Use of multiple satellite systems such as GPS, GLONASS, Galileo, BeiDou

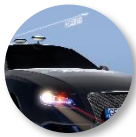

### Option Dual-Ant

Two GNSS antenna option

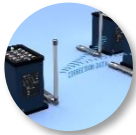

### Option DGNSS Correction Data

Correction data reception via Ethernet

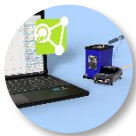

### Option GNSS-Raw Data

Raw data output via Ethernet for post-processing

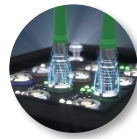

### Option 1kHz

Data output rate of 1 kHz via CAN or Ethernet interface

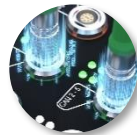

### Option Multi-CAN

Data output via several CAN channels simultaneously

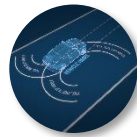

### Option Vehicle Model

2D vehicle model predicts vehicle behavior, supports IMU & adapts to conditions

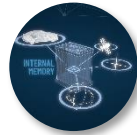

### Option Internal Memory

Storing ADMA measurement data in internal memory

## TECHNICAL DATA

| <b>Complete system*1</b>                                                                   |                                                                     |
|--------------------------------------------------------------------------------------------|---------------------------------------------------------------------|
| GNSS constellations                                                                        | GPS L1, L2<br>GLONASS L1, L2<br>BeiDou*4 B1, B2<br>Galileo*4 E1, E5 |
| Dual antenna                                                                               | Optional                                                            |
| Position accuracy (1 $\sigma$ )*2                                                          | 0.01 / 0.20 / 0.60 / 1.20 / 1.50 m                                  |
| Angle Measurement range roll / pitch / yaw                                                 | $\pm 60^\circ$ / $\pm 60^\circ$ / $180^\circ$                       |
| Angle Measurement accuracy roll & pitch (1 $\sigma$ ) / yaw (1 $\sigma$ ) / sideslip (RMS) | 0.01 / 0.015 / 0.05 $^\circ$                                        |
| Angle resolution                                                                           | 0.005 $^\circ$                                                      |
| Velocity accuracy (RMS)*3                                                                  | 0.03 km/h                                                           |
| Position error after 10 / 30 / 60 sec GNSS outage (RMS)*3                                  | 0.1 / 0.6 / 2.0 m                                                   |
| Velocity error after 10 / 30 / 60 sec GNSS outage (RMS)*3                                  | 0.01 / 0.03 / 0.06 m/sec                                            |
| Roll / Pitch angle error after 10 / 30 / 60 sec GNSS outage (RMS)*3                        | < 0.01 / 0.01 / 0.01 $^\circ$                                       |
| Heading angle error after 10 / 30 / 60 sec GNSS outage (RMS)*3                             | < 0.01 / 0.01 / 0.01 $^\circ$                                       |
| Data output rate                                                                           | 50 / 100 / 200 / 250 / 500 Hz / (1000 Hz)*4                         |
| Calculation latency                                                                        | 1 msec                                                              |

---

**Sensors - Gyros**

|                                       |                                                                                                            |
|---------------------------------------|------------------------------------------------------------------------------------------------------------|
| Sensor Technology                     | 3 closed-loop fiber optic gyros                                                                            |
| Measurement range                     | $\pm 327^\circ/\text{s}$                                                                                   |
| Data output resolution                | 0.0001 $^\circ/\text{s}$                                                                                   |
| Bias repeatability typ. (1 $\sigma$ ) | 6 $^\circ/\text{h}$ (0.0017 $^\circ/\text{s}$ ), optional 1 $^\circ/\text{h}$ (0.00028 $^\circ/\text{s}$ ) |
| In-run-bias typ.                      | 0.1 $^\circ/\text{h}$                                                                                      |
| Noise (random walk) typ.              | 0.047 $^\circ/\sqrt{\text{h}}$                                                                             |
| Scale factor                          | 0.05 %                                                                                                     |
| Sensor bandwidth                      | 3200 Hz                                                                                                    |

---

**Sensors - Accelerometers**

|                                |                                             |
|--------------------------------|---------------------------------------------|
| Sensor Technology              | 3 servo accelerometers                      |
| Measurement range              | $\pm 5 \text{ g} / (\pm 10 \text{ g})^{*4}$ |
| Data output Resolution         | 0.0001 g                                    |
| Bias repeatability typ.        | < 1.0 mg                                    |
| In-run-bias typ. (1 $\sigma$ ) | 10 $\mu\text{g}$                            |
| Noise (random walk) typ.       | < 50 $\mu\text{g} / \sqrt{\text{Hz}}$       |
| Scale factor (1 $\sigma$ )     | 0.015%                                      |
| Sensor bandwidth               | 1500 Hz                                     |

## Interfaces

|                      |                                                                                                                                                                                                               |
|----------------------|---------------------------------------------------------------------------------------------------------------------------------------------------------------------------------------------------------------|
| Ethernet             | 2x 1 GBit<br>Data input/output, configuration and firmware update, driving robot data output, optional for relative data calculation and DGNSS routing.<br>1x 100 MBit<br>GNSS Receiver; GNSS firmware update |
| CAN                  | 1x CAN, 5x CAN* <sup>4</sup> , 2b, 1 Mbit<br>Data output, input* <sup>4</sup>                                                                                                                                 |
| Serial               | 1x RS232<br>GNSS Receiver; DGNSS correction data input<br>1x RS232<br>GNSS Receiver; GPGGA Log output, IPS (Indoor Positioning System)                                                                        |
| Digital/Analog Input | 4x Digital / Analog (16 bit)<br>e.g. Frequency, Brake trigger, ...<br>1x Digital / Analog (16 bit)<br>external velocity X                                                                                     |
| Digital Output       | 4x Digital TTL<br>e.g. PPS, Frequency, PPD Pulse per distance, ...                                                                                                                                            |
| Connector type       | Lemo                                                                                                                                                                                                          |
| GNSS                 | 2x TNC<br>GNSS Antenna connectors                                                                                                                                                                             |

## Hardware / Miscellaneous

|                        |                       |
|------------------------|-----------------------|
| Ordering Variants      | /                     |
| Internal Memory        | up to 64 GB           |
| Power supply           | 9 to 32 VDC typ. 30 W |
| Dimensions (W x L x H) | 110 x 170 x 197 mm    |
| Weight                 | 3.6 kg                |
| Operating temperature  | -20 to +60 °C         |

\*1 Open sky conditions.

\*2 With RTK2 corrections at <10 km from the GNSS Base Station

\*3 Typical values according to internal test standards with settled Kalman filter.

\*4 Optional

\*5 Depending on GNSS correction data and license model

**For any further questions:** [support@genesys-offenburg.de](mailto:support@genesys-offenburg.de)
