# Supplementary material
Source: ML conference proceedings conference paper supplement (https://openreview.net/forum?id=X8ItT6mGKF)
Supplement: supplementary_material [file attachment]

# MTi-680G

- Rugged, IP68 rated RTK GNSS/INS
- 0.2 deg roll/pitch & cm-level position accuracy
- Internal u-blox ZED F9 RTK enabled GNSS receiver

The MTi-680G is an RTK enabled GNSS/INS with a ruggedized housing featuring IP68 protection against environmental influences. Building on the proven Xsens MTi 600-series technology it enables a robust and easy to use cm-level positioning and orientation tracking for outdoor applications. It features a incredibly powerful onboard u-blox ZED F9 RTK GNSS receiver to provide superior positioning performance. It is designed for easy integration and seamless interfacing with other equipment.

The MTi-680G is supported by the MT Software Suite which includes MT Manager (GUI for Windows/Linux), SDK, example codes and drivers for many platforms including ROS.

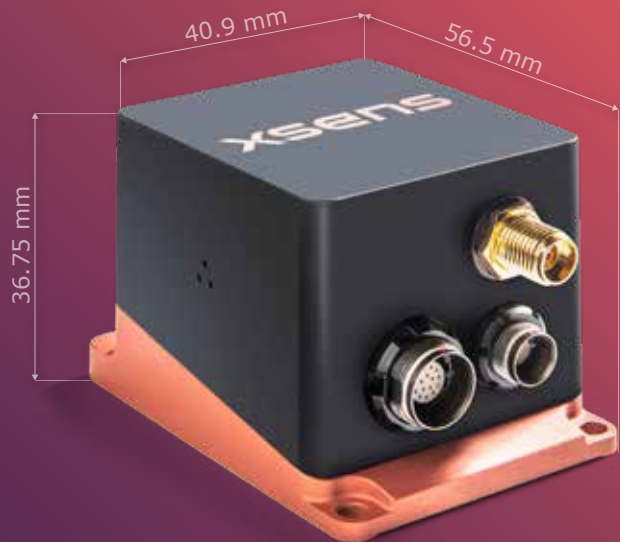

- White label and OEM integration options available
- 3D models available on request

This document is informational and not binding. Complete and detailed specifications are available at [mtidocs.movella.com](http://mtidocs.movella.com)

## Sensor Fusion Performance

|             |                           |
|-------------|---------------------------|
| Roll, Pitch | 0.2 deg RMS               |
| Yaw/Heading | 0.5 deg RMS               |
| Position    | 1cm+1ppm CEP <sup>1</sup> |
| Velocity    | 0.05m/s RMS               |

## Gyroscope

|                         |               |
|-------------------------|---------------|
| Standard full range     | 2000 deg/s    |
| In-run bias stability   | 8 deg/h       |
| Bandwidth (-3dB)        | 520 Hz        |
| Noise Density           | 0.007 °/s/√Hz |
| g-sensitivity (calibr.) | 0.1 °/s/g     |

## Accelerometer

|                       |                   |
|-----------------------|-------------------|
| Standard full range   | 10 g              |
| In-run bias stability | 10 (x,y) 15(z) µg |
| Bandwidth (-3dB)      | 500 Hz            |
| Noise Density         | 60 µg/√Hz         |

## Magnetometer

|                     |         |
|---------------------|---------|
| Standard full range | +/- 8 G |
| Total RMS noise     | 1 mG    |
| Non-linearity       | 0.2%    |
| Resolution          | 0.25 mG |

## RTK GNSS Receiver

|                      |                          |
|----------------------|--------------------------|
| Brand                | u-blox                   |
| Model                | ZED F9                   |
| RTK correction input | RTCM 3.2/3.3             |
| RTCM input port      | RS232 (38K4-921K6 bit/s) |

## Electrical

|                         |            |
|-------------------------|------------|
| Input voltage           | 4.5 to 24V |
| Power consumption (typ) | <1 W       |

<sup>1</sup> Depending on GNSS conditions

## Barometer

|                     |                  |
|---------------------|------------------|
| Standard full range | 300-1250 hPa     |
| Total RMS noise     | 1.2 Pa           |
| Relative accuracy   | +/- 8 Pa (~0.5m) |

## Mechanical

|                       |                                                                         |
|-----------------------|-------------------------------------------------------------------------|
| IP-rating             | IP68                                                                    |
| Operating Temperature | -40 to 85 °C                                                            |
| Casing material       | Aluminum                                                                |
| Mounting orientation  | No restriction, full 360° in all axes                                   |
| Dimensions            | 56.50x40.90x36.75 mm                                                    |
| Connector             | Main: ODU (AMC HD 12 pins)<br>RTCM: ODU (AMC HD 4 pins)<br>Antenna: SMA |
| Weight                | 98 g                                                                    |
| Certifications        | CE, FCC, RoHS                                                           |

## Interfaces / IO

|                    |                            |
|--------------------|----------------------------|
| Interfaces         | CAN, RS232                 |
| Sync Options       | SyncIn, SyncOut, ClockSync |
| Protocols          | Xbus, ASCII (NMEA) or CAN  |
| Clock drift        | 1ppm                       |
| Output Frequency   | Up to 2kHz, 400 Hz SDI     |
| Built-in-self test | Gyro, Acc, Mag, Baro, GNSS |

## Software Suite

|                     |                                                     |
|---------------------|-----------------------------------------------------|
| GUI (Windows/Linux) | MT Manager, Firmware updater, Magnetic Field Mapper |
| SDK (Example code)  | C++, C#, Python, Matlab, Nucleo, public source code |
| Drivers             | LabVIEW, ROS, GO                                    |
| Support             | Online manuals, community and knowledge base        |
