# Supplementary material
Source: ML conference proceedings conference paper supplement (https://openreview.net/forum?id=X8ItT6mGKF)
Supplement: supplementary_material [file attachment]

## Download dataset

The full dataset will soon be available on our [Website](#) and the [AWS Open Data Registry](#).

In the meantime we provide a mini version of the dataset via LRZ Sync+Share.

1. Download the mini dataset by using the provided link and credentials.

Dataset link: <https://syncandshare.lrz.de/getlink/fiAUuVVuTSEab8fP9JTgyQ/manscenes.zip>

Password: eT7959i4eSfG

The mini dataset will be available on LRZ Sync+Share during the review phase. Afterwards, we refer to our [Website](#) or the [AWS Open Data Registry](#) to download MAN TruckScenes. Therefore, just search for TruckScenes in the registry and download the provided archives.

2. Extract all files to `/data/manscenes`.

Eventually you should have the following folder structure:

```
/data/manscenes
  samples - Sensor data for keyframes.
  sweeps  - Sensor data for intermediate frames.
  v1.0-mini - JSON tables that include all the meta data and
  annotations.
```

## Hosting, licensing, and maintenance plan

This section provides a short summary on our hosting, licensing, and maintenance plan. More detailed information on these topics can be found in our dataset documentation.

### Hosting

MAN TruckScenes will be hosted by Amazon Web Services (AWS) as part of the AWS Open Data Sponsorship Program. The program guarantees an open access data provision in compliance with international sanctions and embargos. The data will be available for at least two years, while we aim for a permanent provision of the dataset.

### Licensing

The MAN TruckScenes dataset will be published under the CC-BY-SA 4.0 License.

### Maintenance

We actively maintain the dataset as part of the AWS Open Data Sponsorship Program. Any issues can be raised on our man-devkit GitHub repository.
