# Supplementary material
Source: ML conference proceedings conference paper supplement (https://openreview.net/forum?id=X8ItT6mGKF)
Supplement: supplementary_material [file attachment]

# SF332X-10X Family Preliminary Datasheet

2M Pixel Automotive Camera

SEKONIX Corp. Image Solution Team

# 2Mega LVDS Automotive Camera

SF332X-10X - NVIDIA 2Mega Camera

Written by SEKONIX Image Solution Team \_ Rev 2.2

## Feature

- 1928 x 1208 Resolution (2.3M Pixel)
- Optical format: 1/2.7-inch
- Pixel size: 3μm x 3μm
- 27MHz clock input
- Analog power supply, from 8V (±10%)
- Ultrahigh resolution Lens
- MAXIM - MAX96705 Serializer
- FAKRA Z – TYPE Connector
- Waterproof – IP69K

**Table 1 : Specification Summary**

|           | Parameter               | Value                                       |                           |                         |
|-----------|-------------------------|---------------------------------------------|---------------------------|-------------------------|
| LENS      | Model                   | NA1962                                      | NA1262                    | NA6062                  |
|           | Construction            | 4G2P                                        | 2GM4G                     | 1GM5G                   |
|           | View angle              | V:104°<br>H:190°<br>D:200°                  | V:73°<br>H:120°<br>D:146° | V:38°<br>H:60°<br>D:70° |
| Sensor    | Model                   | Onsemi AR0231 (RCCB or RGB)                 |                           |                         |
|           | Pixel output interfaces | 14-bit parallel                             |                           |                         |
|           | Input clock             | 27Mhz                                       |                           |                         |
| Interface | LVDS(PoC)               | MAX96705 (MAXIM)                            |                           |                         |
|           | Connector               | FAKRA Z TYPE                                |                           |                         |
| Module    | Data Interface          | LVDS 12bit                                  |                           |                         |
|           | SIZE                    | 26 X 26 X 20.3mm<br>(without optic & cable) |                           |                         |
|           | Power                   | 8V                                          |                           |                         |
|           | Optical Axis            | ± 3 pixel                                   |                           |                         |
|           | Water Proof             | IP69K                                       |                           |                         |
|           | Operation Temp          | -40 ~ 85 °C                                 |                           |                         |
|           | Storage Temp            | -40 ~ 105°C                                 |                           |                         |

## Table of contents

|                                     |           |
|-------------------------------------|-----------|
| Feature .....                       | 1         |
| <b>1. Overview</b>                  |           |
| 1.1 Description.....                | 3         |
| 1.2 Ordering information .....      | 4         |
| <b>2. Production Composition</b>    |           |
| 2.1 Components.....                 | 5         |
| 2.2 Block diagram .....             | 6         |
| 2.3 Image data format .....         | 6         |
| <b>3. Specification</b>             |           |
| 3.1 Lens Specification .....        | 7,8       |
| <b>4. Mechanical</b>                |           |
| 4.1 Module dimension.....           | 9         |
| 4.2 Water proof .....               | 10        |
| 4.3 Cable Connector .....           | 11,12     |
| <b>Production Composition .....</b> | <b>13</b> |

## 1. Overview

### 1.1. Description

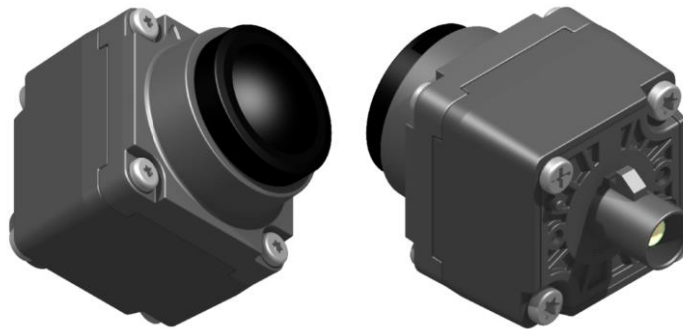

<PIC 1: SF332X-10X Camera Module >

SF332X-10X series are wide angle cameras, consist of ONSEMI CMOS Image Sensor AR0231 (2M Pixel) and SEKONIX ultra high resolution lens. Image output format is Bayer12 and is able to be changed by user's setting. Connecting interface utilizes MAXIM's MAX96705, and FAKRA Z Type connector is applied to the connecting interface. Aluminum die-casting for its housing is applied to this model. Waterproof function (IP69K) is applied.



## 2. Product Composition

### 2.1. Components

The mechanical parts of SF332X-10X are hard and durable. Moreover, it has powerful performances against heat and water.

SF332X-10X consists of automotive qualified design.

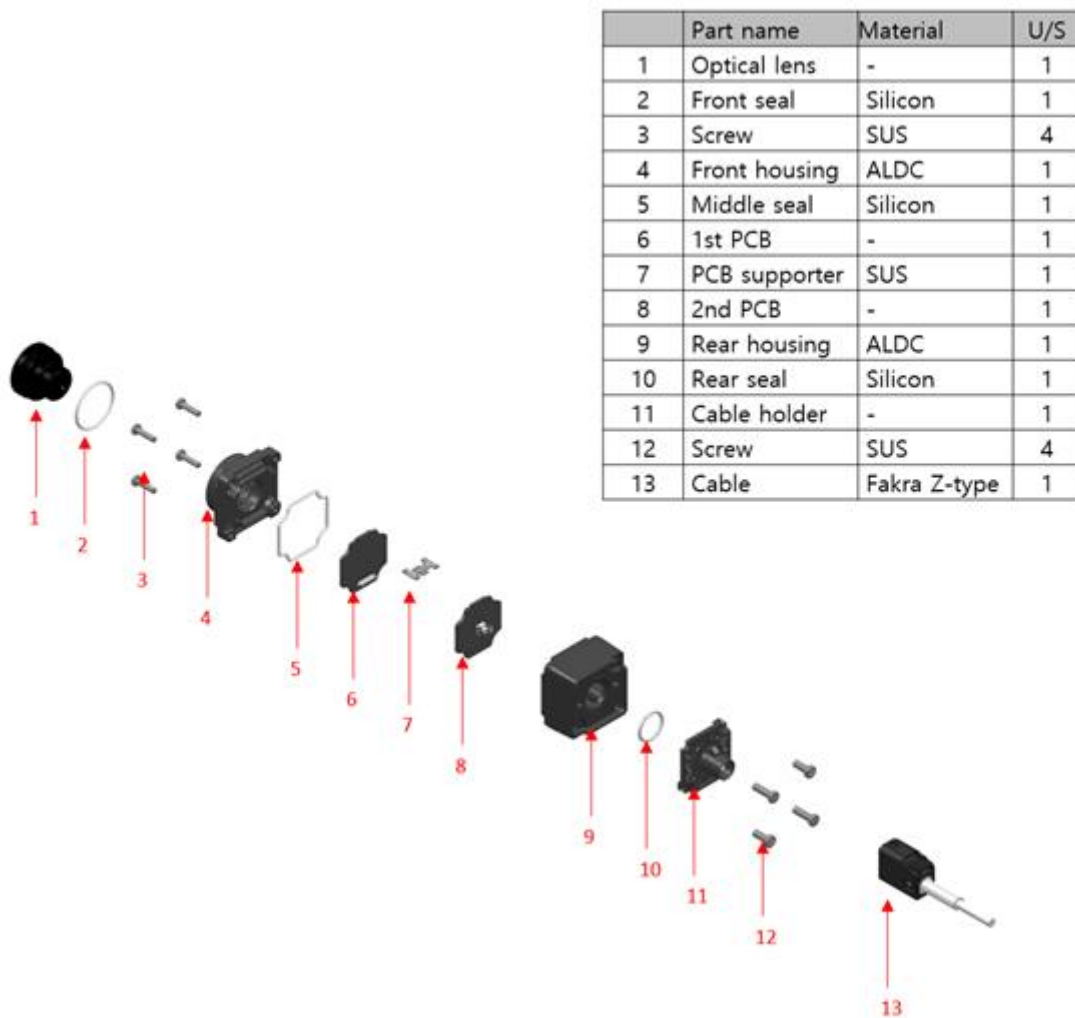

<PIC 2: Parts tear-down>

## 2.2. Block Diagram

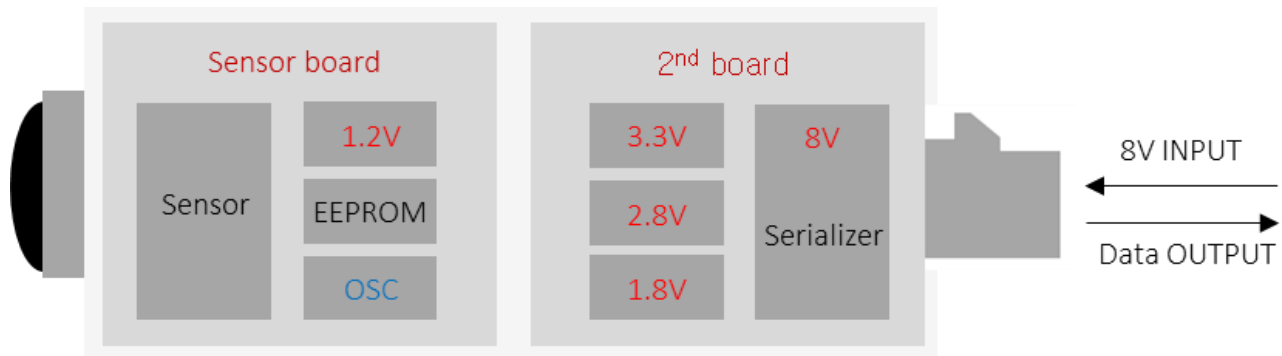

<PIC 3: Block diagram>

## 2.3. Image Data Format

Image Sensor Output sets 14bit but Serializer (MAX96705) support only 12bit. Therefore, it provides 12bit data except top 2bit. And Image format applies Bayer12.

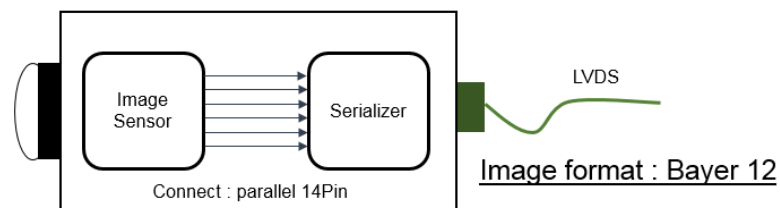

<PIC 4: data format >

### 3. Specification

#### 3.1 Lens Specification

##### ● NA6062 - FOV 60 Lens

The lens of SF3325-10X designed and made by Sekonix – NA6062.

The NA6062lens designed and optimized for best performance with ONSEMI AR0231 sensor.

Furthermore, it targets to meet automotive qualification.

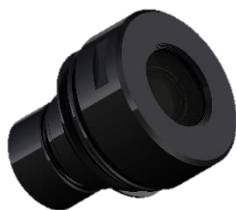

<PIC 5 : NA6062>

| Model Name        | SEKONIX NA6062 -          |
|-------------------|---------------------------|
| Grade             | 1 / 2.7" 2Mega            |
| Viewing Angle     | H : 60°, V : 38°, D : 70° |
| MTF               | TBD                       |
| IR CUT wavelength | 700 ± 10nm                |
| Mount Dimension   | M12 x 0.5P                |

##### ● NA1262 - FOV 120 Lens

The lens of SF3324-10X designed and made by Sekonix – NA1262.

The NA1262lens designed and optimized for best performance with ONSEMI AR0231 sensor.

Furthermore, it targets to meet automotive qualification.

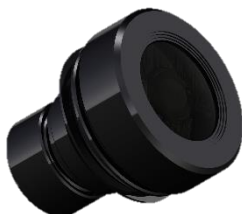

<PIC 7 : NA1262>

| Model Name        | SEKONIX NA1262              |
|-------------------|-----------------------------|
| Grade             | 1 / 2.7" 2Mega              |
| Viewing Angle     | H : 120°, V : 73°, D : 146° |
| MTF               | TBD                         |
| IR CUT wavelength | 700 ± 10nm                  |
| Mount Dimension   | M12 x 0.5P                  |



## ● NA1962 - FOV 190 Lens

The lens of SF3326-10X designed and made by Sekonix fisheye lens - NA1962.

The NA1962 lens designed and optimized for best performance with ONSEMI AR0231 sensor.

Furthermore, it targets to meet automotive qualification.

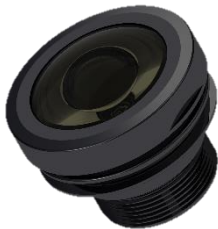

<PIC 9 : NA1962>

| Model Name        | SEKONIX NA1962               |
|-------------------|------------------------------|
| Grade             | 1 / 2.7" Mega                |
| Viewing Angle     | V : 104°, H : 190°, D : 200° |
| MTF               | TBD                          |
| IR CUT wavelength | 700 ± 10nm                   |
| Mount Dimension   | M12 x 0.5P                   |

## 4. Mechanical

### 4.1 Module dimension

Compact design for the vehicle mounting. Metal housing for enhanced heat prevention and duration. Rear body is integral with FAKRA Z type connector without pigtail Cable

#### SF3326-10X : 190 degree, 26X26, sensor only type

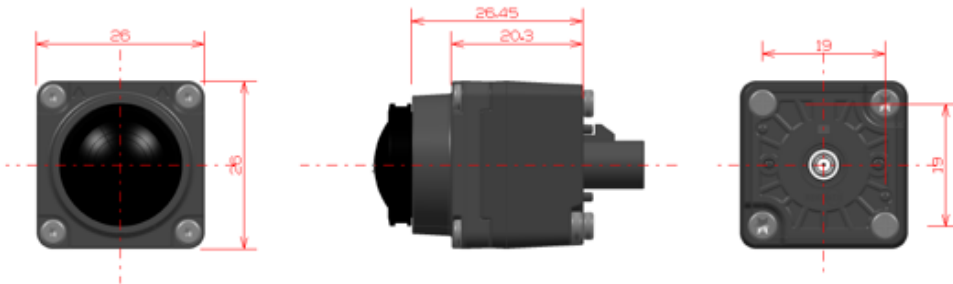

#### SF3324-10X : 120 degree, 26X26, sensor only type

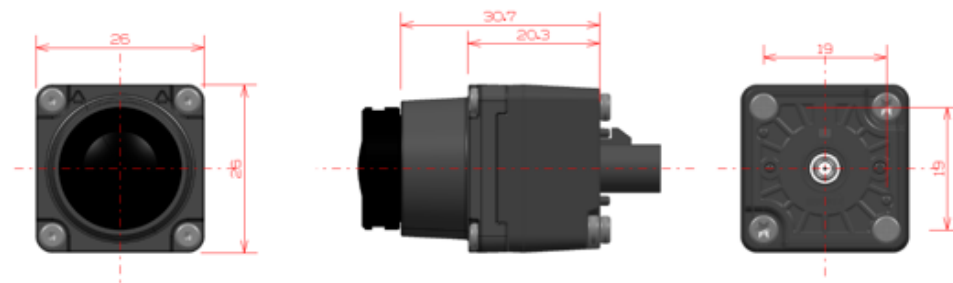

#### SF3325-10X : 60 degree, 26X26, sensor only type

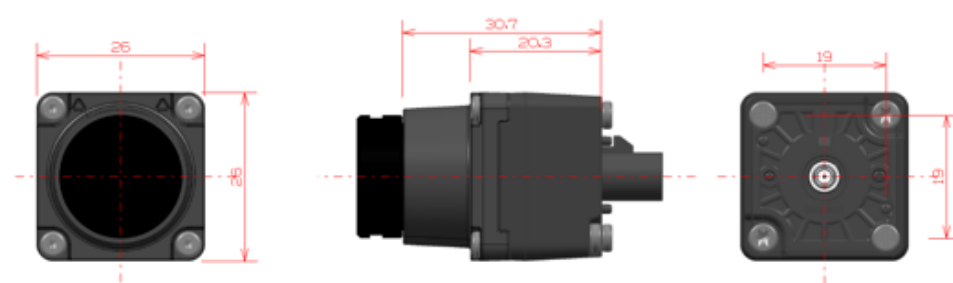

<PIC 11 : Dimension & shape>

## 4.2 Water Proof

- Metal Housing and sealed Gasket implemented for water/weather-proof.
- Silicon Seal implemented for extra humid protection.
- Triple-sealed structure implemented

Waterproof : IP69K

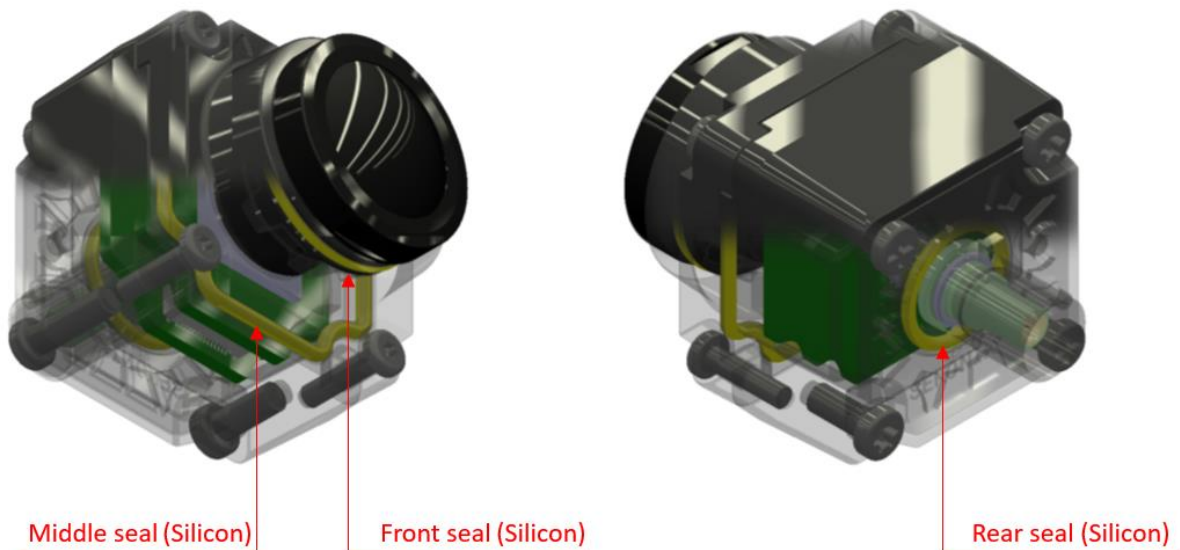

<PIC 12 : waterproof >

### 4.3 Cable & Connector

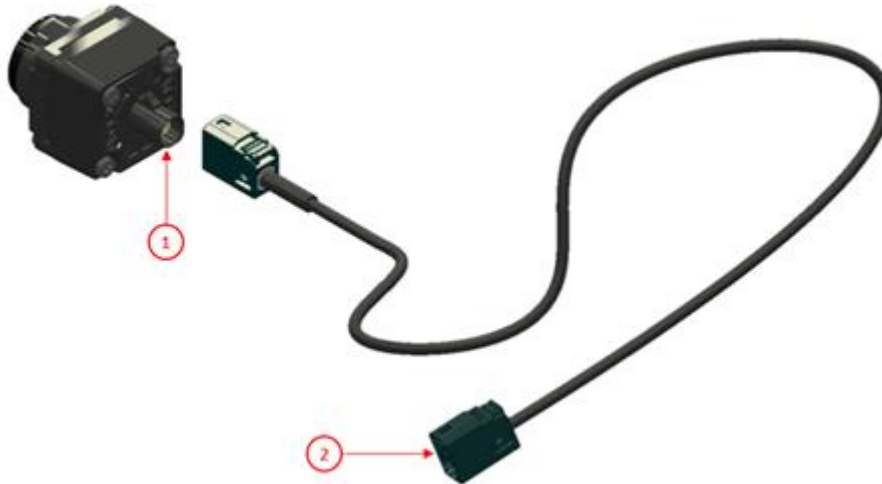

<PIC 13 : Camera and cable connector >

- ① Connector housing – FAKRA Z Type connector applied
- ② Cable connector (FAKRA type) – SMK CRS9001 connector supports IP69K

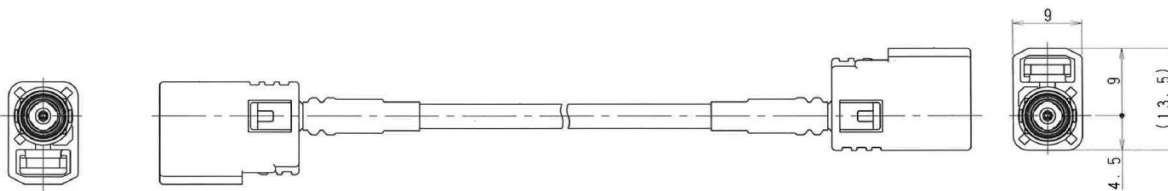

<PIC 14 : Cable & connector>

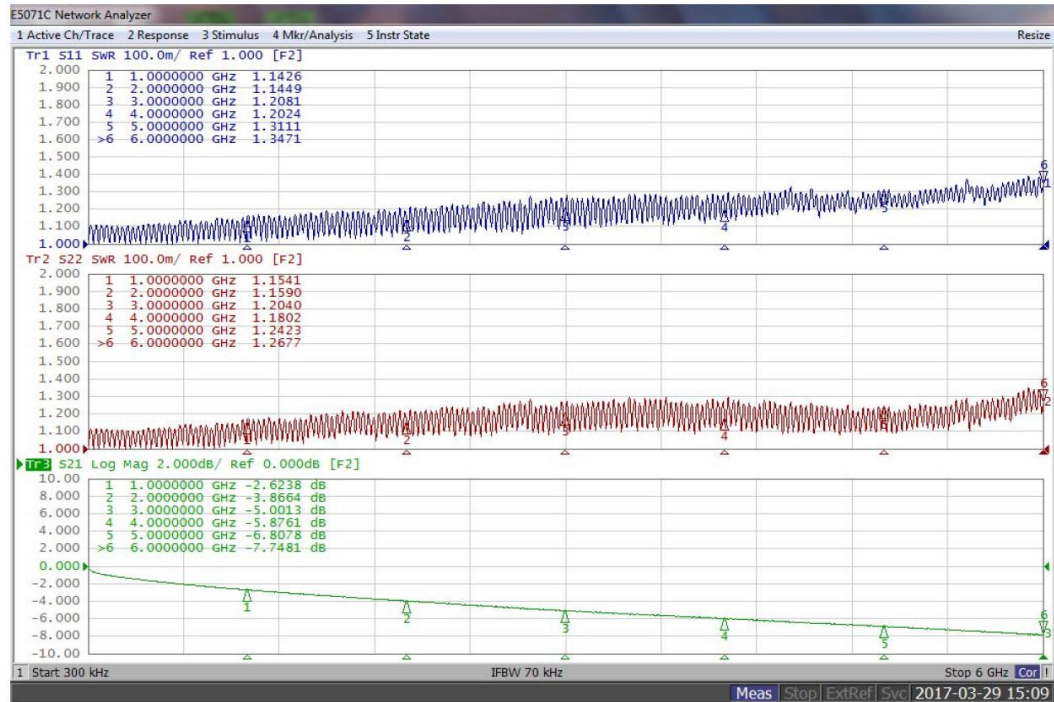

<PIC 14 : V SWR · Insertion Loss Comparison Data>

## Additional Characteristics

### Family items

| Part Numbers | Descriptions                                                   |
|--------------|----------------------------------------------------------------|
| SF3324-100   | Sekonix_Camera_2M_AR0231_LVDS(PoC)_120(H) - 26x26x2b_rev0_RCCB |
| SF3325-100   | Sekonix_Camera_2M_AR0231_LVDS(PoC)_60(H) - 26x26x2b_rev0_RCCB  |
| SF3326-100   | Sekonix_Camera_2M_AR0231_LVDS(PoC)_190(H) - 26x26x2b_rev0_RCCB |
| SF3324-101   | Sekonix_Camera_2M_AR0231_LVDS(PoC)_120(H) - 26x26x2b_rev0_RGB  |
| SF3325-101   | Sekonix_Camera_2M_AR0231_LVDS(PoC)_60(H) - 26x26x2b_rev0_RGB   |
| SF3326-101   | Sekonix_Camera_2M_AR0231_LVDS(PoC)_190(H) - 26x26x2b_rev0_RGB  |

### Additional version

| Part numbers | Product Description                                                                                                         |
|--------------|-----------------------------------------------------------------------------------------------------------------------------|
| SF312X-20X   | Sekonix_Camera_2M_AR0231+AP0202_LVDS(PoC)_XXX(H)_26x26x3b_rev0_RCCB<br>(Image output format YUV @30fps, Serializer MAX9275) |
| SB1100       | Test board – Deserializer MAX9276                                                                                           |

### Cable

| Part Numbers | Descriptions                                                                                                        |
|--------------|---------------------------------------------------------------------------------------------------------------------|
| SC3112       | Sekonix_Camera_Cable_3m_SMK_Fakra_Doubleside<br>(3 Stands for 3 meters, number change depending on length of cable) |

## Revision History

| Date of change | Revision | Page  | Contain of change                                                                                                                                           |
|----------------|----------|-------|-------------------------------------------------------------------------------------------------------------------------------------------------------------|
| 20160824       | 1.0      |       |                                                                                                                                                             |
| 20170417       | 2.0      |       |                                                                                                                                                             |
| 20170607       | 2.2.1    | 13    | Cable connector – SMK CRS9001 connector supports IP69K                                                                                                      |
|                |          | 14    | Added Cable part numbers & descriptions                                                                                                                     |
| 20170607       | 2.2.2    | 7,8,9 | Lens Specification updated                                                                                                                                  |
| 20180912       | 2.2.4    | 7,8,9 | Lens Specification updated : Lens, IR CUT wavelength is modified from '650±10 nm' to '700±10 nm'. The value is measured by more accurate measurement method |
| 20190726       | 2.2.5    | 7,8,9 | Lens Specification updated                                                                                                                                  |
